# Supplementary material for: Insights into the Taxonomically Challenging Hexaploid Alpine Shrub Willows of Salix Sections Phylicifoliae and Nigricantes (Salicaceae)
Source: MDPI journal article supplement (doi:10.3390/plants12051144), 2023-03-02
Supplement: s1 [file s1]

## Supplement Fig. S4 sNMF

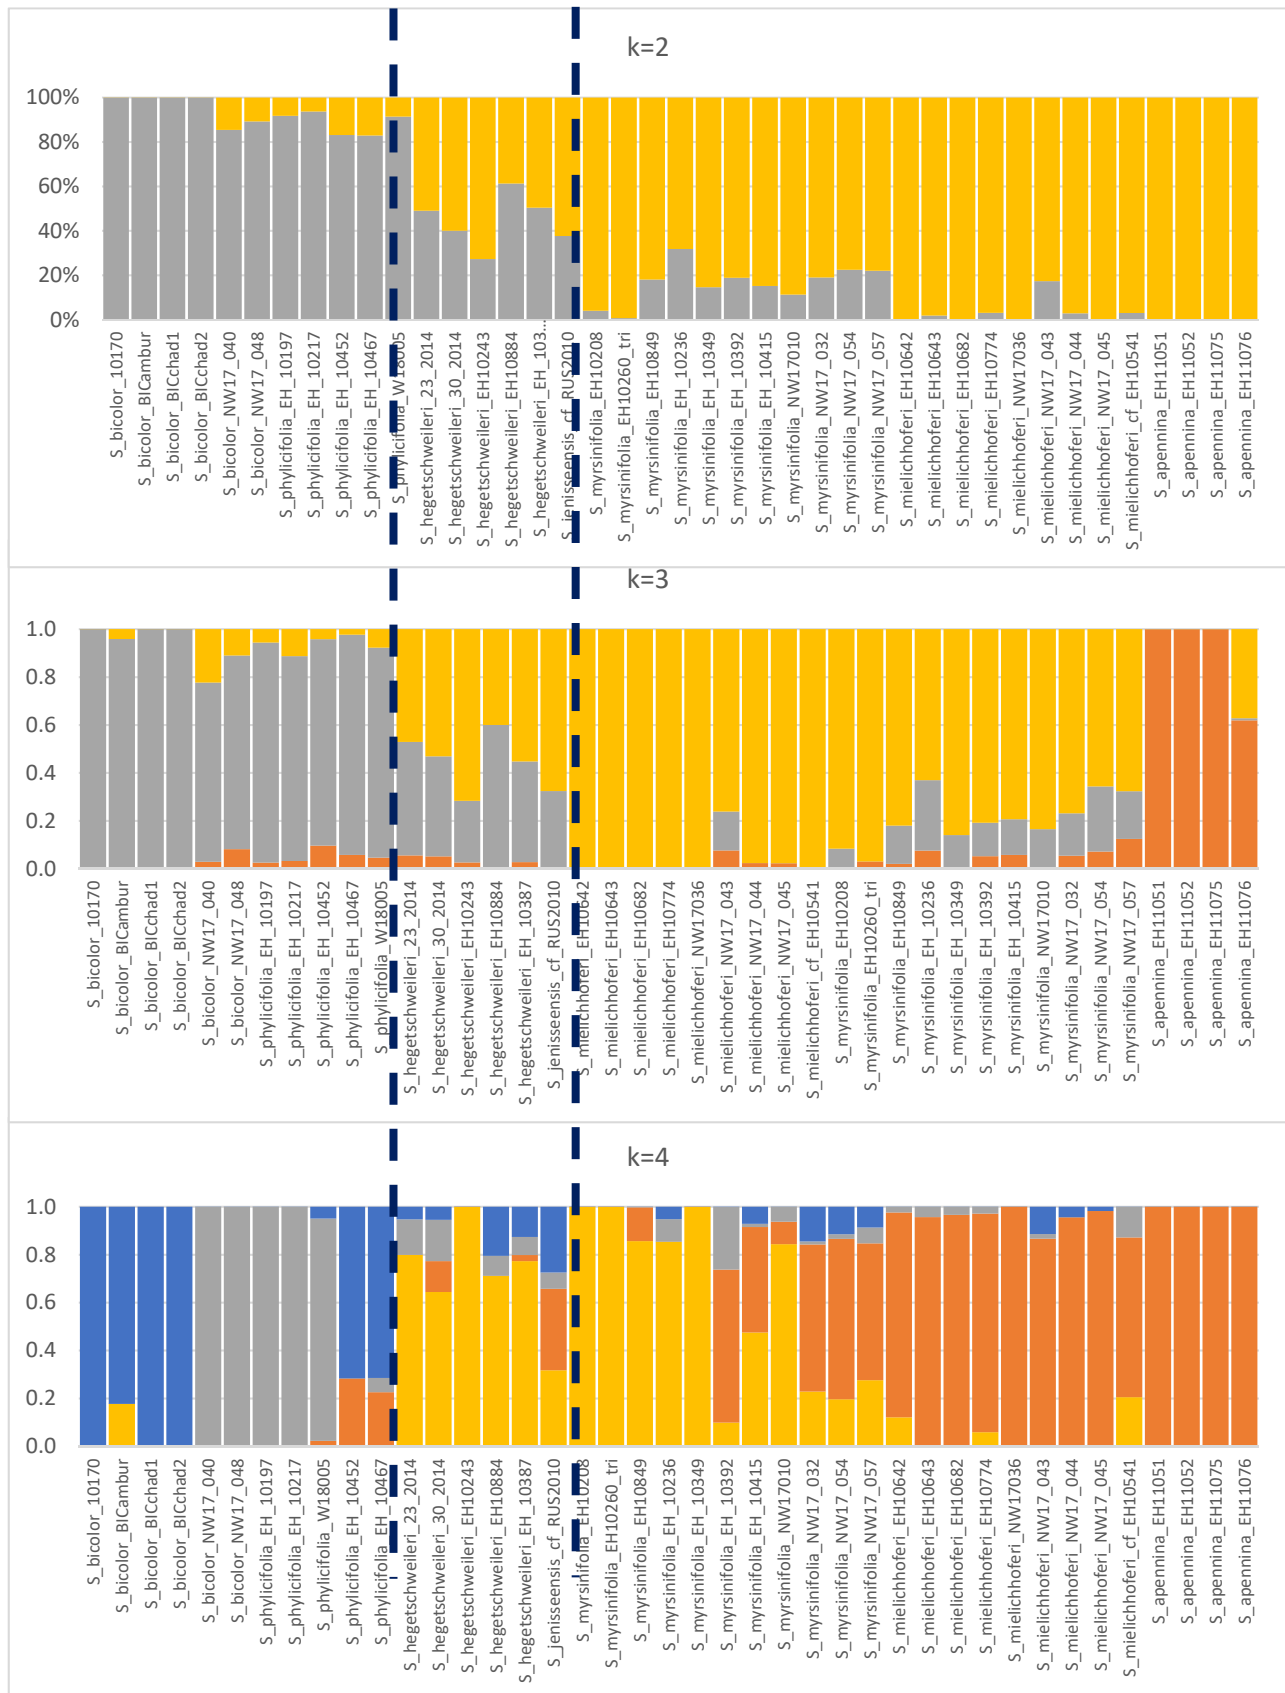

**Fig S4 a Genetic structure analysis with sNMF** including all hexaploid species based on 49,754 RAD loci. Displayed are barplots for three different  $k$  values. Colors represent genetic co-ancestry. For  $k=2$ , individuals grouping in the clade “*Nigricantes*” are shown in yellow and *Phyllicifoliae* in grey. Each bar represents one sample, the respective ID is indicated below each bar

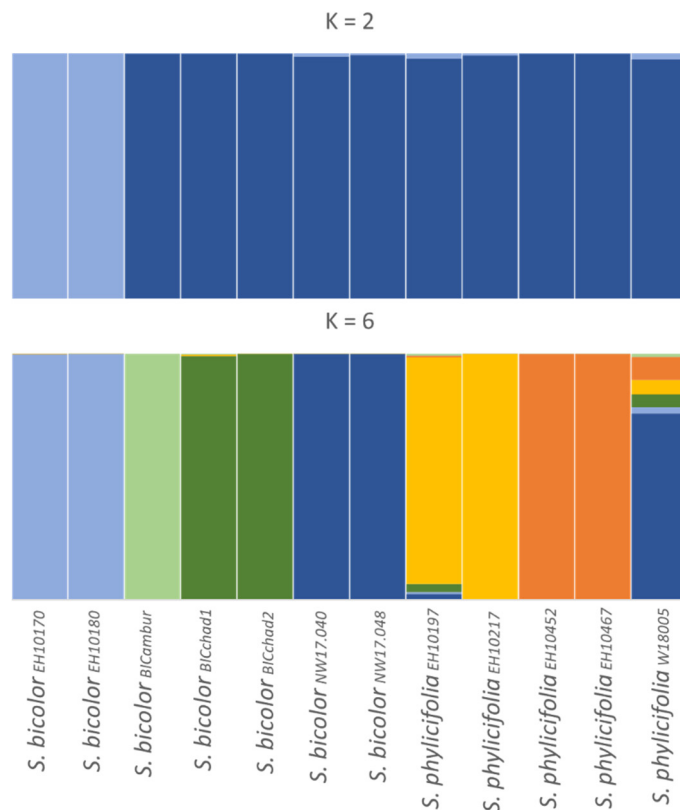

**Fig S4 b.** Barplot representing the results of the genetic structure analysis with sNMF for *S. bicolor* and *S. phyllicifolia* for  $k=2$  and  $k=6$  based on 27,010 RAD loci. The genetic structure is indicated by colors. Each bar represents one sample, the respective ID is indicated below each bar.

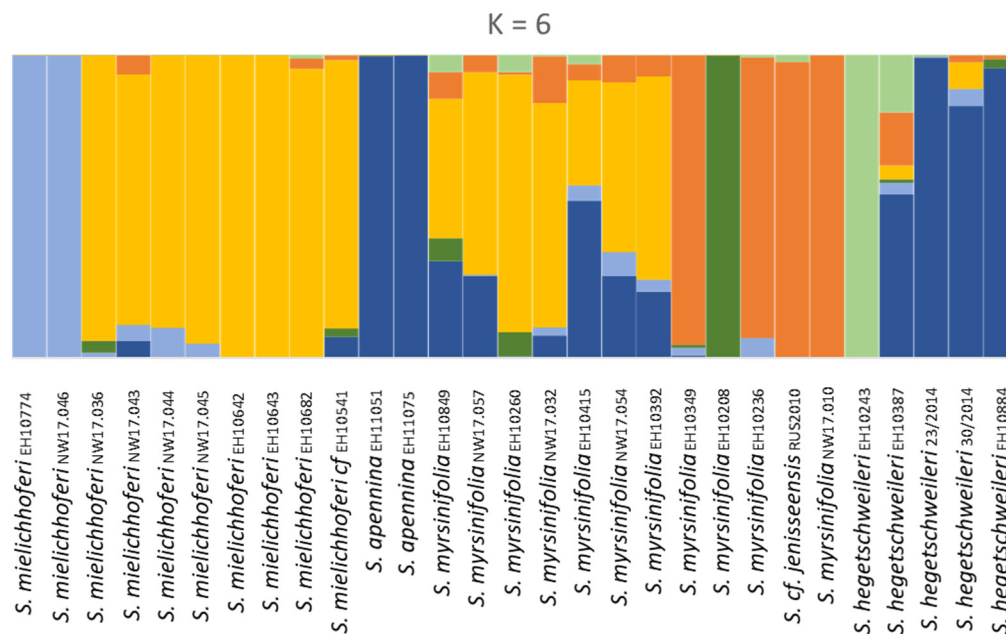

**Fig S4 c.** Barplot representing the results of the genetic structure analysis with sNMF for samples of section *Nigricantes* for  $k=6$  based on 8,164 shared RAD loci. The genetic structure is indicated by colours. Each bar represents one sample, the respective ID is indicated below each bar.
