# Supplementary material for: Insights into the Taxonomically Challenging Hexaploid Alpine Shrub Willows of Salix Sections Phylicifoliae and Nigricantes (Salicaceae)
Source: Plants (Basel). 2023 Mar 2;12(5):1144. doi: 10.3390/plants12051144 (PMC10005704; doi:10.3390/plants12051144)
Supplement: Supplementary file 1 [file plants-12-01144-s001.zip]

Archive with 10 entries (10 files):
- Suppl_Fig_S1_RAxML_backbone_quartetsampling.pdf
- Suppl_Fig_S2_RAxML_hexaploids.pdf
- Suppl_Fig_S3 clade wise RADpainter.pdf
- Suppl_Fig_S4_sNMF.pdf
- Suppl_Fig_S5_spetroscopy_results.pdf
- Suppl_Fig_S6_PCA_3 taxa.pdf
- Suppl_Table_S1_Sampling_list_final.xlsx
- Suppl_Table_S2_FlowCytometry.xlsx
- Suppl_Table_S3_Morphometry statistics.xlsx
- Suppl_Table_S4_hegetschweileri-myrsinifolia.xlsx
