# Supplementary material for: Insights into the Taxonomically Challenging Hexaploid Alpine Shrub Willows of Salix Sections Phylicifoliae and Nigricantes (Salicaceae)
Source: Plants (Basel). 2023 Mar 2;12(5):1144. doi: 10.3390/plants12051144 (PMC10005704; doi:10.3390/plants12051144)
Supplement: Supplementary file 1 [file plants-12-01144-s001.zip › Suppl_Table_S1_Sampling_list_final.xlsx]

## Sheet: Sample list
Wagner et al., 2023
sample list
Sampling	for molecular studies
										coordinates						BIOPROJECT
ID	species	published in	remark	Sectional classification	Country	state	region	detail	altitude	lat	long	coord decimal	coll date	coll	HERBARIUM	NCBI Genbank*
NW17.075	Salix alpina	Wagner et al 2020		Myrtosalix	Austria	Lower Austria	Puchberg am Schneeberg	Schneeberg	1807	47°45.489	15°49.916	47,76333 N 15,8419 E	2017-08-09	N. Wagner, K. Scheufler	GOET	PRJNA433286
NW17.067	Salix alpina	Wagner et al 2020		Myrtosalix	Austria	Lower Austria	Reichenau an der Rax	Raxalpe	1551	47°43.021	15°46.562	47,71722 N 15,7822 E	2017-08-08	N. Wagner, K. Scheufler	GOET	PRJNA433286
NW17.068	Salix alpina	Wagner et al 2020		Myrtosalix	Austria	Lower Austria	Reichenau an der Rax	Raxalpe	1551	47°43.021	15°46.562	47,71722 N 15,7822 E	2017-08-08	N. Wagner, K. Scheufler	GOET	PRJNA433286
EH11075	Salix apennina	this study		Nigricantes	Italy	Northern Apennines	Monte Prato, Lago della Bargettana		1766	N44°15'18.4"	E10°24'16.2"	44,255 N 10,4044 E	2021-08-05	E. Hörandl	GOET	PRJNA433286
EH11076	Salix apennina	this study		Nigricantes	Italy	Northern Apennines	Monte Prato, Lago della Bargettana		1766	N44°15'18.4"	E10°24'16.2"	44,255 N 10,4044 E	2021-08-05	E. Hörandl	GOET	PRJNA433286
EH11052	Salix apennina	this study		Nigricantes	Italy	Abruzzo	Monti di Laga, Fiume		710	N42°39'52.1"	E13°30'24.6"	42,66444 N 13,5066 E	2021-07-31	E. Hörandl	GOET	PRJNA433286
EH11051	Salix apennina	this study		Nigricantes	Italy	Abruzzo	Monti di Laga, Morricana Falls		1560	N42°39'40.2"	E13°24'10.6"	42,66111 N 13,4027 E	2021-07-29	E. Hörandl	GOET	PRJNA433286
24	Salix appendiculata	Wagner et al 2018		Cinerella	Switzerland	Valais	Rhône Glacier		1770	46°34'07.4"	08°22'22.9"	46,56861 N 8,37277 E	2014-07-17	S. Gramlich	GOET	PRJNA433286
51	Salix appendiculata	Wagner et al 2018		Cinerella	Switzerland	Valais	Rhône Glacier		1770	46°34'9.8"	08°22'22.9"	46,56916 N 8,37277 E	2014-07-17	S. Gramlich	GOET	PRJNA433286
PM20028	Salix appendiculata	this study		Cinerella	Slovenia	Western Slovenia	Trnovo Forest Plateau	Hollow under Srednji and Veliki Golak	1383	45°58'33''N	13°52'32''E	45,97583 N 13,8755 E	2019-08-06	Pia Marinček	GOET	PRJNA433286
EH10505	Salix atrocinerea	this study		Vetrix	Spain	Cantabria	Cordillera Cantabrica	Picos de Europa, Fuente De	1080	43°08'39.5'N	4°48'34.4''W	43,14416 N 4,8094 W	2018-07-17	E. Hörandl & F. Hadacek	GOET	PRJNA433286
EH10526	Salix atrocinerea	this study		Vetrix	Spain	Asturia	Northern coast	Llames de Pria, Playa de Guadamia	4	43°27'14.04"N	4°59'2.32"W	43,45389 N 4,98389 W	2018-07-26	E. Hörandl & F. Hadacek	GOET	PRJNA433286
EH10528	Salix atrocinerea	this study		Vetrix	Spain	Asturia	Northern coast	Villadiviciosa	4	43°31'24.0"N	5°22'32.9"W	43,52333 N 5,37556 W	2018-07-27	E. Hörandl & F. Hadacek	GOET	PRJNA433286
NW17.055	Salix aurita	Wagner et al 2020		Vetrix	Austria	Lower Austria	Göstling an der Ybbs	Hochreit	881	47°46.471	14°57.729	47,77972 N 14,97 E	2017-08-07	N. Wagner, K. Scheufler	GOET	PRJNA433286
EH10179	Salix aurita	Wagner et al 2020		Vetrix	Germany	Saxony-Anhalt	Harz	Brocken, Schierke, Brockenstraße beim Nationalparkhaus	1140	51° 46' 21,68''	10°38' 32,84''	51,7725 N 10,64222 E	2014-06-06	E. Hörandl & G. Karste	GOET	PRJNA433286
NW17.002	Salix aurita	Wagner et al 2020		Vetrix	Germany	Hesse	Hoher Meißner		622	51.219109	9.869392	51.219109 N 9.869392 E	2017-05-26	N. Wagner, M. Wagner	GOET	PRJNA433286
EH10377	Salix aurita	Wagner et al 2020		Vetrix	Sweden	Southern Sweden	Södermanland	NE von Enstaberga	50	58° 45' 50,3'	16° 51' 48,7''	58,76389 N 16,86333 E	2017-06-05	E. Hörandl & F. Hadacek	GOET	PRJNA433286
BICchad1	Salix bicolor	this study		Phylicifoliae	Switzerland	Fribourg (Freiburg)	Grandvillard	Gros Chadoua, dans peuplement dense d'Alnus viridis sur éboulis calcaire		46.5006	7.10082	46,50061 N 7,10082 E	2023-09-17	Bornand Christophe	GOET	PRJNA433286
BICchad2	Salix bicolor	this study		Phylicifoliae	Switzerland	Fribourg (Freiburg)	Grandvillard	Gros Chadoua, dans peuplement dense d'Alnus viridis sur éboulis calcaire		46.5004	7.10094	46,50038 N 7,10094 E	2023-09-17	Bornand Christophe	GOET	PRJNA433286
EH10170	Salix bicolor	Wagner et al 2020	locus classicus	Phylicifoliae	Germany	Saxony-Anhalt	Harz	Brocken, an der Straße E vom Brockenhaus (cult., Material aus Halle)	1110	51°47'59,55''	10°37'11,43''	51,79972 N 10,61972 E	2014-06-20	E. Hörandl & G. Karste	GOET	PRJNA433286
EH10180	Salix bicolor	Wagner et al 2020	locus classicus	Phylicifoliae	Germany	Saxony-Anhalt	Harz	Brocken, Brockengarten (cult., Material vom Brocken, bei den Hieracien nahe Eingang)	1140	51°47'56,32''	10°36'54,08''	51,79889 N 10,615 E	2014-06-20	E. Hörandl & G. Karste	GOET	PRJNA433286
BICambur	Salix bicolor	this study		Phylicifoliae	Switzerland	Vaud (Waadt)	Le Chenit	Les Amburnex, Le Moé, pâturage légèrement marécageux		46.5462	6.23122	46,5462 N 6,23122 E	2022-09-13	Bornand Christophe	GOET	PRJNA433286
NW17.040	Salix bicolor	Wagner et al 2020		Phylicifoliae	Austria	Salzburg	Lungau	Dr. Josef Mehrlhütte, Bundschuh, Thomatal, Österreich	1722	46°58.70?	13°46.51?	46,98611 N 13,78083 E	2017-05-04	N.Wagner, K. Scheufler	GOET	PRJNA433286
NW17.048	Salix bicolor	Wagner et al 2020		Phylicifoliae	Austria	Salzburg	Lungau	Dr. Josef Mehrlhütte, Bundschuh, Thomatal, Österreich	1722	46°58.672	13°46.431	46,98528 N 13,77861 E	2017-08-05	N.Wagner, K. Scheufler	GOET	PRJNA433286
EH10508	Salix breviserrata	this study		Myrtosalix	Spain	Cantabria	Cordillera Cantabrica	Picos de Europa, Collada Horcados Rojos	2360	43°10'49.3'N	4°49'57.1''W	43,18028 N 4,8325 W	2018-07-18	E. Hörandl & F. Hadacek	GOET	PRJNA433286
EH10265	Salix breviserrata	Wagner et al 2018		Myrtosalix	Italy	South Tyrol	Vinschgau	Stilfserjoch, Franzenshöhe, am Dreifernerweg	2220	46°31'52,3''	10°28'56,3''	46,53111 N 10,48222 E	2015-08-03	E. Hörandl, S. Hörandl, F. Hadacek	GOET	PRJNA433286
EH10276	Salix breviserrata	Wagner et al 2018		Myrtosalix	Italy	South Tyrol	Vinschgau	Sulden, am Weg von der Langensteinhütte nach St. Gertraud	2000	46°31'22,2''	10°34'55,8''	46,52278 N 10,58194 E	2015-08-04	E. Hörandl, S. Hörandl, F. Hadacek	GOET	PRJNA433286
EH10421	Salix caesia	Wagner et al 2020		Caesiae	Switzerland	Graubünden	Bernina-Pass	La Rösa	1881	46°24'15,0	10°03'59,6	46,40417 N 10,06639 E	2017-08-08	E. Hörandl, S. Hörandl, F. Hadacek	GOET	PRJNA433286
EH10390	Salix caesia	this study		Caesiae	Italy	Prov. Sondrio	Livigno Alps	Valdidentro, Valle Pettini	1980	46°32'03,2 N	10°15'03,8 E	46,53417 N 10,25083 E	2017-07-29	E. Hörandl, S. Hörandl, F. Hadacek	GOET	PRJNA433286
EH10416	Salix caesia	Wagner et al 2020		Caesiae	Italy	South Tyrol	Prov. Sondrio	Livigno-Alpen	2113	46°33'48,9	10°11'39,4	46,56333 N 10,19417 E	2017-08-05	E. Hörandl, S. Hörandl, F. Hadacek	GOET	PRJNA433286
EH10491	Salix cantabrica	this study		Nigricantes	Spain	Cantabria	Cordillera Cantabrica	Espinilla W von Reinosa, am Río Híjar	930	43°01'03.2''N	4°13'41.8''W	43,0175 N 4,22806 W	2018-07-15	E. Hörandl & F. Hadacek	GOET	PRJNA433286
EH10497	Salix cantabrica	this study		Nigricantes	Spain	Cantabria	Cordillera Cantabrica	Espinilla W von Reinosa, Refugio de Solvay an der Straße zum Pico Tres Mares	1734	43°02'28.5''N	4°22'17.0''W	43,04111 N 4,37139 W	2018-07-15	E. Hörandl & F. Hadacek	GOET	PRJNA433286
EH10515	Salix cantabrica	this study		Nigricantes	Spain	Leon	Cordillera Cantabrica	Puerto di San Glorio, Collado de Llesba	1640	43°4'46.2'N	4°45'21.2''W	43,07944 N 4,75583 W	2018-07-21	E. Hörandl & F. Hadacek	GOET	PRJNA433286
EH10506	Salix cantabrica_cf	this study		Nigricantes	Spain	Cantabria	Cordillera Cantabrica	Picos de Europa, Fuente De	1080	43°08'39.5'N	4°48'34.4''W	43,14417 N 4,80944 W	2018-07-17	E. Hörandl & F. Hadacek	GOET	PRJNA433286
EH10151	Salix caprea	Wagner et al 2020		Vetrix	Germany	Lower Saxony	Göttingen	Südlich von Geismar, am Fuß vom Mülldeponie-Hügel	200	51° 30' 05,7''	9°57' 51,8''	51,50139 N 9,96417 E	2014-05-05	E. Hörandl	GOET	PRJNA433286
EH10164	Salix caprea	Wagner et al 2020		Vetrix	Germany	Lower Saxony	Leinetal	Wendebachtal zwischen Reinhausen und Niedernjesa (S von Göttingen)	175	51° 28' 15,7''	9°57' 43,2''	51,47083 N 9,96194 E	2014-05-05	E. Hörandl	GOET	PRJNA433286
EH10169	Salix caprea	Wagner et al 2020		Vetrix	Germany	Lower Saxony	Leinetal	Wendebachtal zwischen Reinhausen und Niedernjesa (S von Göttingen)	175	51° 28' 13,9	9°57' 39,3''	51,47028 N 9,96083 E	2014-05-05	E. Hörandl	GOET	PRJNA433286
EH10319	Salix ceretana	Wagner et al 2020	as lapponum ssp ceretana	Villosae	Andorra	Pyrenees		Estanys de Jucla (NE Soldeu)	2319	42° 36' 31,4''	1°43' 21,7''	42,60861 N 1,7225 E	2016-07-07	E. Hörandl, S. Hörandl, F. Hadacek	GOET	PRJNA433286
EH10328	Salix cinerea	Wagner et al 2020		Vetrix	Germany	Lower Saxony	Leinetal	Wendebachtal zwischen Reinhausen und Niedernjesa (S von Göttingen)	184	51° 28' 15,2''	9°56' 54,9''	51,47083 N 9,94833 E	2017-04-14	E. Hörandl	GOET	PRJNA433286
NW17.082	Salix cinerea	Wagner et al 2020		Vetrix	Austria	Burgenland	Podersdorf	Neusiedlersee	126	47°54.334	16°52.992	47,90917 N 16,89417 E	2017-08-09	N. Wagner, K. Scheufler	GOET	PRJNA433286
NW17.009	Salix cinerea	Wagner et al 2020		Vetrix	Estonia	Saare	Saaremaa	Orrissaare	2	58°55.4634	23°08.3282	58,92944 N 23,14222 E	2017-06-29	N. Wagner	GOET	PRJNA433286
EH10468	Salix cinerea	Wagner et al 2020		Vetrix	Finland	Southern Finland		Nagu, Hangslax	20	60° 10' 29,8'	22° 01' 37,5''	60,17472 N 22,02694 E	2018-05-23	E. Hörandl, F. Hadacek	GOET	PRJNA433286
8	Salix daphnoides	Wagner et al 2018		Daphnella	Switzerland	Valais	Rhône Glacier		1770	46°34'02.8"	08°22'07.4"	46,56722 N 8,36861 E	2014-07-16	S. Gramlich	GOET	PRJNA433286
EH10263	Salix daphnoides	Wagner et al 2018		Daphnella	Italy	South Tyrol	Vinschgau	Stilfserjoch, Franzenshöhe	2220	46°31'55,4''	10°28'26,7''	46,53194 N 10,47389 E	2015-08-03	E. Hörandl, S. Hörandl, F. Hadacek	GOET	PRJNA433286
EH10290	Salix daphnoides	Wagner et al 2018		Daphnella	Italy	South Tyrol	Vinschgau	Trafoi, am Trafoibach	1485	46°33'10,4''	10°30'42,4''	46,55278 N 10,51167 E	2015-08-11	E. Hörandl, S. Hörandl, F. Hadacek	GOET	PRJNA433286
EH10495	Salix eleagnos	this study		Canae	Spain	Cantabria	Cordillera Cantabrica	Espinilla W von Reinosa, am Río Híjar	930	43°01'03.2''N	4°13'41.8''W	43,0175 N 4,22806 W	2018-07-15	E. Hörandl & F. Hadacek	GOET	PRJNA433286
T1	Salix eleagnos	Wagner et al 2018		Canae	Austria	Tyrol	Karwendel	Nähe Stallenalm	1500	47°22`36.5``	11°38`12.7``	47,37667 N 11,63667 E	2014-07-01	A. Danler	GOET	PRJNA433286
EH10255	Salix eleagnos	Wagner et al 2018		Canae	Italy	South Tyrol	Vinschgau	Prad am Stilfserjoch, Alluvionengelände SW von Spondinig	890	46°38'08,1''	10°36'19,6''	46,63556 N 10,60528 E	2015-08-02	E. Hörandl, S. Hörandl, F. Hadacek	GOET	PRJNA433286
43	Salix foetida	Wagner et al 2018		Arbusculae	Switzerland	Valais	Rhône Glacier		1780	46°33'56.9"	08°22'11.7"	46,56556 N 8,36972 E	2014-07-19	S. Gramlich	GOET	PRJNA433286
35/2014	Salix foetida	Wagner et al 2018		Arbusculae	Switzerland	Valais	Rhône Glacier		1791	46°34'00.9''	08°22'30.8''	46,56667 N 8,375 E	2014-07-18	S. Gramlich	GOET	PRJNA433286
36/2014	Salix foetida	Wagner et al 2018		Arbusculae	Switzerland	Valais	Rhône Glacier		1782	46°33'59.9''	08°22'28.5''	46,56639 N 8,37444 E	2014-07-18	S. Gramlich	GOET	PRJNA433286
EH10273	Salix foetida	Wagner et al 2018		Arbusculae	Italy	South Tyrol	Vinschgau	Sulden, St. Gertraud, Talstation Langensteinlift	1850	46°31'33,8''	10°35'10,9''	46,52583 N 10,58611 E	2015-08-04	E. Hörandl, S. Hörandl, F. Hadacek	GOET	PRJNA433286
HL133-1	Salix gracilistylia	He et al 2020		Subviminales	China	Jilin	Antu County, Erdaobaihe		1111	42°11'28.82	128°11'20.05	42,19111 N 128,18889 E	2017-08-14	Li He, Jun Zhao	GOET	PRJNA433286
HL133-2	Salix gracilistylia	He et al 2020		Subviminales	China	Jilin	Antu County, Erdaobaihe		1111	42°11'28.82	128°11'20.05	42,19111 N 128,18889 E	2017-08-14	Li He, Jun Zhao	GOET	PRJNA433286
TS1076	Salix gussonei	this study		Vetrix	Italy	Sicilia	Gaggi, Alcantara river		68	N 37°51'09"	E 15°13'00"	37,8525 N 15,21667 E	2018-08-02	Tomasello S. & Sylvester Y	GOET	PRJNA433286
EH10195	Salix hastata	Wagner et al 2018		Hastatae	Norway	Oppland	Dovrefjell	Fokstumyra	956	62°07'09,7''	9°16'47,7''	62,11917 N 9,27972 E	2014-08-07	E. Hörandl, S. Hörandl, F. Hadacek	GOET	PRJNA433286
EH10269	Salix hastata	Wagner et al 2018		Hastatae	Italy	South Tyrol	Vinschgau	Sulden, am Weg von der Langensteinhütte nach St. Gertraud	1940	46°31'27,5''	10°35'04,3''	46,52417 N 10,58444 E	2015-08-04	E. Hörandl, S. Hörandl, F. Hadacek	GOET	PRJNA433286
23_2014	Salix hegetschweileri	this study		Phylicifoliae	Switzerland	Valais	Gletschboden		1802	46°34'15.7''	08°22'45.8''	46,57083 N 8,37917 E	2014-07-17	S. Gramlich	GOET	PRJNA433286
30_2014	Salix hegetschweileri	this study		Phylicifoliae	Switzerland	Valais	Gletschboden		1792	46°34'11.7''	08°22'36.8''	46,56972 N 8,37667 E	2014-07-18	S. Gramlich	GOET	PRJNA433286
EH10387	Salix hegetschweileri	this study		Phylicifoliae	Austria	Tyrol	Ötztal Alps	Obergurgl, Zirbenwald, bei d. Brücke ca. 1 km SW Obergurgl	1935	46°51'43,6" N,	11°01'06,81"	46,86194 N 11,01833 E	2017-07-23	E. Hörandl et al.	GOET	PRJNA433286
EH10884	Salix hegetschweileri	this study	locus classicus	Phylicifoliae	Switzerland	Kt. Uri	Urseren	zwischen Andermatt und Realp	1553	46°36'22.0"N.	8°31'25.0"E	46,60611 N 8,52361 E	2020-07-28	E. Hörandl & F. Hadaèek	GOET	PRJNA433286
EH10243	Salix hegetschweileri	Wagner et al 2020	as S. myrsinifolia	Phylicifoliae	Austria	Tyrol	Ötztal Alps	Obergurgl, Umgebung der Brücke bei der Davidshütte	1930	46°51'44,8''	11°01'02,9''	46,86222 N 11,01722 E	2015-07-07	E. Hörandl, S. Hörandl, F. Hadacek	GOET	PRJNA433286
1_2014	Salix helvetica	Wagner et al 2018		Villosae	Switzerland	Valais	Gletschboden, Gletsch under Rhône Glacier		n/a	46°34'00.7''	08°22'02.4''	46,56667 N 8,36722 E	2014-07-16	S. Gramlich	GOET	PRJNA433286
T9	Salix helvetica	Wagner et al 2018		Villosae	Austria	Tyrol	Ötztal Alps	Ötztal, Langtal	2400	46.8227	10.9903	47,385 N 11,65778 E	2014-08-01	A. Danler	GOET	PRJNA433286
6	Salix helvetica	Wagner et al 2018		Villosae	Switzerland	Valais	Rhône Glacier		1770	46°34'1.7"	08°22'5.1"	46,56694 N 8,36806 E	n/a	S. Gramlich	GOET	PRJNA433286
44/1	Salix helvetica	Wagner et al 2018		Villosae	Switzerland	Valais	Rhône Glacier		1780	46°33'51.1"	08°22'9.1"	46,56417 N 8,36917 E	2010-07-22	E. Hörandl et al.	GOET	PRJNA433286
10216	Salix herbacea	Wagner et al 2018		Retusae	Norway	Sogn og Fjordane	Aurland	Aurlandsdalen, Steinbergdalshytta - Kongshelleren	1280	60°46'41.1''	7°35'43.6''	60,77806 N 7,59528 E	2014-08-13	E. Hörandl, S. Hörandl, F. Hadacek	GOET	PRJNA433286
10206	Salix herbacea	Wagner et al 2018		Retusae	Norway	Oppland	Reinheimen	Blåhø, Jettjørni See	1078	61°54'10.9''	9°08'31.8''	61,90278 N 9,14194 E	2014-08-08	E. Hörandl, S. Hörandl, F. Hadacek	GOET	PRJNA433286
25_2014	Salix herbacea	Wagner et al 2018		Retusae	Switzerland	Valais	Rhône Glacier		1751	46°33'56.6''	08°22'13.3''	46,56556 N 8,37028 E	2014-07-17	S. Gramlich	GOET	PRJNA433286
28_2014	Salix herbacea	Wagner et al 2018		Retusae	Switzerland	Valais	Rhône Glacier		1751	46°33'51.6''	08°22'05.8''	46,56417 N 8,36806 E	2014-07-17	S. Gramlich	GOET	PRJNA433286
HL72-1	Salix integra	Wagner et al 2020		Helix	China	Zhejiang	Linan, Daxiagu Town, Shangxi		795	30°18'27.39	119°06'56.40	30,3075 N 119,11556 E	2017-07-04	Li He	GOET	PRJNA433286
HL72-2	Salix integra	Wagner et al 2020		Helix	China	Zhejiang	Linan, Daxiagu Town, Shangxi		795	30°18'27.39	119°06'56.40	30,3075 N 119,11556 E	2017-07-04	Li He	GOET	PRJNA433286
HL66-1	Salix integra	Wagner et al 2020		Helix	China	Zhejiang	Linan, Qianqingtang		1110	30°18'27.37	119°06'57.16	30,3075 N 119,11583 E	2017-07-04	Li He	GOET	PRJNA433286
RUS2010	Salix jenisseensis cf	this study		Nigricantes	Russia	Komi Republic		from Bot. Garden Novosibirsk	n.a.	n.a.	n.a.	n.a.	x1986	Maria Tomoshevich	GOET	PRJNA433286
NW20.001	Salix kaptarae	this study		Nigricantes	Greece	Crete	Chania	South of Chania, Agia-Lake (Locus classicus), Eastern shore, behind reed bend, in water	31	35°28'31.2	23°56'08.5''	35,47528 N 23,93556 E	2020-03-03	N. Wagner, M. Wagner	GOET	PRJNA433286
EH10852	Salix laggeri	this study		Vetrix	Switzerland	Graubünden	Engadin	Malojapass, unterhalb Calvoccio-See, an der Straße bei der Bachbrücke	1885	46°22'57.6"N	9°42'23.6"E	46,3825 N 9,70639 E	2020-07-26	E. Hörandl & F. Hadacek	GOET	PRJNA433286
EH10385	Salix laggeri	Wagner et al 2020		Vetrix	Austria	Tyrol	Ötztal Alps	Obergurgl, Zirbenwald, bei d. Brücke ca. 1 km SW Obergurgl	1935	46°51'43,6"	11°01'06,81"	46,86194 N 11,01833 E	2017-07-23	E. Hörandl et al.	GOET	PRJNA433286
EH10950	Salix laggeri	this study		Vetrix	Switzerland	Kt. Waadt	Vaud Alps	Solalex bei Bex, Hänge Richtung Merouet	1517	46°17'02.5"N.	7°08'20.9"E	46,28389 N 7,13889 E	2020-08-02	E. Hörandl & F. Hadaèek	GOET	PRJNA433286
EH10215	Salix lanata	Wagner et al 2020		Lanatae	Norway	Sogn og Fjordane	Aurland	Aurlandsdalen, Østerbø, an der Straße	847	60°43'35,4''	7°29'16,0''	60,72639 N 7,48778 E	2014-08-08	E. Hörandl, S. Hörandl, F. Hadacek	GOET	PRJNA433286
EH10209	Salix lanata	Wagner et al 2020		Lanatae	Norway	Oppland	Reinheimen	Blåhø, Jettjørni See	1090	61°54'29,8''	9°08'57,5''	61,90806 N 9,14917 E	2014-08-08	E. Hörandl, S. Hörandl, F. Hadacek	GOET	PRJNA433286
EH10199	Salix lapponum	Wagner et al 2020		Villosae	Norway	Oppland	Dovrefjell	Fokstumyra	950	62°07'08,6''	9°16'08,3''	62,11889 N 9,26889 E	2014-08-08	E. Hörandl, S. Hörandl, F. Hadacek	GOET	PRJNA433286
EH10183	Salix lapponum	Wagner et al 2020		Villosae	Norway	Oppland	Rondane	Høvringen	1000	61°53'39,11''	9°29'14,6''	61,89417 N 9,48722 E	2014-08-08	E. Hörandl, S. Hörandl, F. Hadacek	GOET	PRJNA433286
EH10232	Salix lapponum	Wagner et al 2020		Villosae	Norway	Sirdal	Sinnes	Teich bei Haugen	556	58°55'12,75''	6°54'19,7''	58,92 N 6,90528 E	2014-08-08	E. Hörandl, S. Hörandl, F. Hadacek	GOET	PRJNA433286
EH10642	Salix mielichhoferi	this study		Nigricantes	Italy	South Tyrol	Dolomites	Grödnerjoch	2050	46°32'46.8"N	11°48'21.9"E	46,54611 N 11,80583 E	2019-08-06	E. Hörandl & F. Hadacek	GOET	PRJNA433286
EH10682	Salix mielichhoferi	this study		Nigricantes	Italy	South Tyrol	Dolomites	Grödnerjoch, gegen Corvara	2056	46°32'54.4"N	11°.48'.48.3"E	46,54833 N 11,81333 E	2019-08-06	E. Hörandl & F. Hadacek	GOET	PRJNA433286
NW17.036	Salix mielichhoferi	this study		Nigricantes	Austria	Salzburg	Hohe Tauern	Murtal	1421	47°07.279	13°25.429	47,12417 N 13,42833 E	2017-08-04	N.Wagner, K. Scheufler	GOET	PRJNA433286
NW17.043	Salix mielichhoferi	this study		Nigricantes	Austria	Salzburg	Lungau	Gurktaler Alpen; Dr. Josef Mehrlhütte	1727	46°58.703	13°46.540	46,98611 N 13,78167 E	2017-08-05	N.Wagner, K. Scheufler	GOET	PRJNA433286
NW17.044	Salix mielichhoferi	this study		Nigricantes	Austria	Salzburg	Lungau	Gurktaler Alpen; Dr. Josef Mehrlhütte	1727	46°58.703	13°46.540	46,98611 N 13,78167 E	2017-08-05	N.Wagner, K. Scheufler	GOET	PRJNA433286
NW17.045	Salix mielichhoferi	this study		Nigricantes	Austria	Salzburg	Lungau	Gurktaler Alpen; Dr. Josef Mehrlhütte	1725	46°58.709	13°46.512	46,98611 N 13,78083 E	2017-08-05	N.Wagner, K. Scheufler	GOET	PRJNA433286
EH10774	Salix mielichhoferi	this study		Nigricantes	Austria	Salzburg	Nock mountains	Schönfeld, Dr. Josef-Mehrl-Hütte	1730	46°58'42.5"N	13°.46'.30.7"E	46,97833 N 13,775 E	2019-08-14	E. Hörandl & F. Hadacek	GOET	PRJNA433286
EH10643	Salix mielichhoferi	this study		Nigricantes	Italy	South Tyrol	Dolomites	Grödnerjoch	2050	46°32'46.8"N.	11°.48'.21.9"E	46,54611 N 11,80583 E	2019-08-06	E. Hörandl & F. Hadacek	GOET	PRJNA433286
EH10944	Salix myrsinifolia	this study		Nigricantes	Switzerland	Kt. Wallis	Bernese Alps	Lötschental	1977	46°26'39.0"N.	7°53'44.3"E	46,44417 N 7,89556 E	2020-07-31	E. Hörandl & F. Hadaèek	GOET	PRJNA433286
EH10236	Salix myrsinifolia	Wagner et al 2020		Nigricantes	Norway	Telemark	Dalen	Eirfjell	680	59°28'21,3''	8°05'37,6''	59,4725 N 8,09361 E	2014-08-23	E. Hörandl, S. Hörandl, F. Hadacek	GOET	PRJNA433286
EH10849	Salix myrsinifolia	this study		Nigricantes	Switzerland	Graubünden	Engadin	Julierpass (Richtung Tiefencastel)	1908	46°27'40.0"N	9°40'58.1"E	46,46111 N 9,68278 E	2020-07-26	E. Hörandl & F. Hadacek	GOET	PRJNA433286
NW17.054	Salix myrsinifolia	this study		Nigricantes	Austria	Niederösterreich	Göstling an der Ybbs		527	47°48.672	14°56.048	47,81861 N 14,93444 E	2017-08-06	N.Wagner, K. Scheufler	GOET	PRJNA433286
NW17.057	Salix myrsinifolia	this study		Nigricantes	Austria	Niederösterreich	Göstling an der Ybbs	Hochreit	877	47°46.203	14°57.723	47,77222 N 14,97 E	2017-08-07	N.Wagner, K. Scheufler	GOET	PRJNA433286
NW17.032	Salix myrsinifolia	this study		Nigricantes	Austria	Oberösterreich	Hochkönig	Mühlbachtal	1473	47°24.457	13°07.612	47,4125 N 13,13361 E	2017-08-03	N.Wagner, K. Scheufler	GOET	PRJNA433286
EH10392	Salix myrsinifolia	this study		Nigricantes	Italy	Prov. Sondrio	Livigno Alps	Valdidentro, Lago Cancano	1965	46°31'31,3 N	10°17'14,7 E	46,52528 N 10,28722 E	2017-07-29	E. Hörandl, S. Hörandl, F. Hadacek	GOET	PRJNA433286
EH10415	Salix myrsinifolia	this study		Nigricantes	Italy	Prov. Sondrio	Livigno Alps	Valle di Foscagna	2110	46°33'50,2 N,	10°11'35,2 E	46,56389 N 10,19306 E	2017-08-05	E. Hörandl, S. Hörandl, F. Hadacek	GOET	PRJNA433286
EH10349	Salix myrsinifolia	this study		Nigricantes	Sweden	Southern Sweden	Öland	Persnäs	10	57°04'06.5''N	16°54'59.0''E	57,06833 N 16,91639 E	2017-05-29	E. Hörandl, S. Hörandl & F. Hadacek	GOET	PRJNA433286
NW17.010	Salix myrsinifolia	this study		Nigricantes	Estonia	Saaremaa	Orissaare		0	58.552327	23.080368	58,92556 N 23,14333 E	2017-06-29	N.Wagner	GOET	PRJNA433286
EH10208	Salix myrsinifolia	Wagner et al 2020		Nigricantes	Norway	Oppland	Reinheimen	Blåhø, Jettjørni See	1078	61°54'10,9''	9°08'31,8''	61,90278 N 9,14194 E	2014-08-08	E. Hörandl, S. Hörandl, F. Hadacek	GOET	PRJNA433286
EH10260	Salix myrsinifolia	Wagner et al 2020		Nigricantes	Italy	South Tyrol	Vinschgau	Stilfserjoch, Franzenshöhe	2206	46°31'55,1''	10°28'42,8''	46,53194 N 10,47833 E	2015-08-08	E. Hörandl, S. Hörandl, F. Hadacek	GOET	PRJNA433286
W18004	Salix myrsinites	this study		Myrtosalix	Finland	Kuusamo			n.a.	66°22'12.3"N	29°18'44.1"E	66,37 N 29,31222 E	2018-06-10	T. Nyman	GOET	PRJNA433286
HL134-2	Salix nummularia	Wagner et al 2020		Retusae	China	Jilin	Antu County, Changbai Mountain		2400	42°02'29.27	128°04'03.52	42,04139 N 128,0675 E	2017-08-15	Li He, Jun Zhao	GOET	PRJNA433286
HL134-3	Salix nummularia	Wagner et al 2020		Retusae	China	Jilin	Antu County, Changbai Mountain		2400	42°02'29.27	128°04'03.52	42,04139 N 128,0675 E	2017-08-15	Li He, Jun Zhao	GOET	PRJNA433286
HL134-4	Salix nummularia	Wagner et al 2020		Retusae	China	Jilin	Antu County, Changbai Mountain		2400	42°02'29.27	128°04'03.52	42,04139 N 128,0675 E	2017-08-15	Li He, Jun Zhao	GOET	PRJNA433286
TS1074	Salix pedicellata	this study		Vetrix	Italy	Sicily	Bolognetta	Cascate Fiume Milicia	180 m	N 37°59'40"	E 13°29'00"	37,99444 N 13,48333 E	2018-07-31	Tomasello S. & Sylvester Y	GOET	PRJNA433286
EH10217	Salix phylicifolia	this study		Phylicifoliae	Norway	Sogn og Fjordane	Aurland	Myrdal in Richtung Kaldavasshytta	1215	60°43'33,4'' N	7°06'24,4'' E	60,72583 N 7,10667 E	2014-08-14	E. Hörandl, S. Hörandl, F. Hadacek	GOET	PRJNA433286
EH10197	Salix phylicifolia	this study		Phylicifoliae	Norway	Oppland	Dovrefjell	Fokstumyra	956	62°07'09,7'' N;	9°16'47,7'' E	62,11917 N 9,27972 E	2014-08-07	E. Hörandl, S. Hörandl, F. Hadacek	GOET	PRJNA433286
EH10467	Salix phylicifolia	this study		Phylicifoliae	Finland	S-Finland	Skerry islands	Nagu, Hangslax	20	60° 10' 29,8'' N,	22° 01' 37,5'' E	60,17472 N 22,02694 E	2018-05-23	E. Hörandl & F. Hadacek	GOET	PRJNA433286
EH10452	Salix phylicifolia	this study		Phylicifoliae	Finland	S-Finland		Lahnajärvi	60	60° 23' 3,9'' N,	23° 41' 59,9'' E	60,38417 N 23,69972 E	2018-05-19	E. Hörandl & F. Hadacek	GOET	PRJNA433286
W18005	Salix phylicifolia	this study		Phylicifoliae	Finland	Kuusamo			n.a.	66°22'12.3"N	29°18'44.1"E	66,37 N 29,31222 E	2018-06-10	T. Nyman	GOET	PRJNA433286
SK652	Salix polaris	this study		Retusae	Norway	Kongsvoll	Dovrefjell		1300	62.3049	9.64196	62,30485 N 9,64196 E	2013	A Cortes, TF Nilsen, S Karrenberg	UPS	PRJNA433286
SK727	Salix polaris	this study		Retusae	Norway	Finse	Hardangervidd		1400	60.6032	7.53814	60,60323 N 7,53814 E	2013	A Cortes, TF Nilsen, S Karrenberg	UPS	PRJNA433286
SK475	Salix polaris	this study		Retusae	Russia	Chokurdakh	Sakha		100	70.7386	148.764	70,73858 N 148,7637 E	2013	A Cortes, TF Nilsen, S Karrenberg	UPS	PRJNA433286
SK513	Salix polaris	this study		Retusae	Norway	Tromsø	Tromsdalstinde		300	71.1289	25.7055	71,12892 N 25,7055 E	2013	A Cortes, TF Nilsen, S Karrenberg	UPS	PRJNA433286
8_2014	Salix purpurea	Wagner et al 2018		Helix	Switzerland	Valais	Gletschboden	bei Gletsch unterhalb Rhonegletscher	1783	46°34'03.1''	08°22'13.5''	46,5675 N 8,37028 E	2014-07-16	S. Gramlich	GOET	PRJNA433286
EH10154	Salix purpurea	Wagner et al 2018		Helix	Germany	Saxony-Anhalt	Halle	Geiseltalsee S von Halle	108	51° 18' 53,3''	11°54' 19,8''	51,31472 N 11,90528 E	2014-05-18	E. Hörandl	GOET	PRJNA433286
EH10181	Salix purpurea	Wagner et al 2018		Helix	Germany	Saxony-Anhalt	Harz	Elend, Mandelholz	453	51° 44' 32,2''	10°43' 31,8''	51,74222 N 10,72528 E	2014-06-21	E. Hörandl	GOET	PRJNA433286
14	Salix purpurea	Wagner et al 2018		Helix	Switzerland	Valais	Unterwassern		1365	46°32'13.2"	08°21'27.4"	46,53694 N 8,3575 E	2010-07-20	EH, ACC, PS, FH	GOET	PRJNA433286
TS1077	Salix purpurea ssp lambertiana	this study		Helix	Italy	Sicily	Gaggi	Fiume Alcantara	68	N 37°51'09"	E 15°13'00"	37,8525 N 15,21667 E	2018-08-02	Tomasello S. & Sylvester Y	GOET	PRJNA433286
EH10322	Salix pyrenaica	Wagner et al 2020		Glaucae	France	Pyrenees	Cirque de Troumouse, Gèdre		2260	42° 43' 12,8''	0° 07' 04,8''	42,72 N 0,11778 W	2016-07-07	E. Hörandl, S. Hörandl, F. Hadacek	GOET	PRJNA433286
EH10321	Salix pyrenaica	Wagner et al 2020		Glaucae	France	Pyrenees	Puerto de Bujaruelo / Port du Boucharo o de Gavarnie		2285	42° 42' 12,7''	W 0° 03' 48,9''	42,70333 N 0,06333 W	2016-07-07	E. Hörandl, S. Hörandl, F. Hadacek	GOET	PRJNA433286
EH10326	Salix pyrenaica	Wagner et al 2020		Glaucae	France	Pyrenees	Soum Blanc des Especières, Gavarnie	Sattel NNE vom Gipfel	2537	42° 43' 10,9''	W 0° 04' 05,8''	42,71944 N 0,06806 W	2016-07-07	E. Hörandl, S. Hörandl, F. Hadacek	GOET	PRJNA433286
RUS1622	Salix pyrolifolia	this study		Hastatae	Russia	Republic of Buryatia	Bogdarin village	from Bot. Garden Novosibirsk	n.a.	n.a.	n.a.		1984	Maria Tomoshevich	GOET	PRJNA433286
HL119-1	Salix pyrolifolia	Wagner et al 2020		Hastatae	China	Heilongjian	Daxinganling, Tahe County, Shisanzhixian		403	52°26'25.42	124°50'50.67	52,44028 N 124,84722 E	2017-08-11	Li He, Wancheng Hou, Gongru Zhou	GOET	PRJNA433286
HL122-1	Salix pyrolifolia	Wagner et al 2020		Hastatae	China	Heilongjian	Daxinganling, Tahe County, Shisanzhixian		440	52°28'32.5	124°48'34.56	52,47556 N 124,80944 E	2017-08-11	Li He, Wancheng Hou, Gongru Zhou	GOET	PRJNA433286
W18001b	Salix pyrolifolia	this study		Hastatae	Finland	Kuusamo			n.a	66°22'12.3"N	29°18'44.1"E	66,37 N 29,31222 E	2018-06-09	T. Nyman	GOET	PRJNA433286
W18002	Salix pyrolifolia	this study		Hastatae	Finland	Kuusamo			n.a.	66°22'12.3"N	29°18'44.1"E	66,37 N 29,31222 E	2018-06-09	T. Nyman	GOET	PRJNA433286
HL85-1	Salix rehderiana	Wagner et al 2020		Vimen	China	Sichuan	Luding County, Hailuogou		3026	29°34'28.52	101°59'28.31	29,57444 N 101,99111 E	2017-07-16	Li He,Jun Zhao	GOET	PRJNA433286
HL85-2	Salix rehderiana	Wagner et al 2020		Vimen	China	Sichuan	Luding County, Hailuogou		3026	29°34'28.52	101°59'28.31	29,57444 N 101,99111 E	2017-07-16	Li He,Jun Zhao	GOET	PRJNA433286
HL85-3	Salix rehderiana	Wagner et al 2020		Vimen	China	Sichuan	Luding County, Hailuogou		3026	29°34'28.52	101°59'28.31	29,57444 N 101,99111 E	2017-07-16	Li He,Jun Zhao	GOET	PRJNA433286
HL81	Salix rehderiana	Wagner et al 2020		Vimen	China	Sichuan	Tianquan County, Erlang Mountain	Yuanyangyan Bridge	2011	29°52'45.66	102°20'14.52	29,87917 N 102,33722 E	2017-07-15	Li He,Jun Zhao	GOET	PRJNA433286
EH10177	Salix repens	Wagner et al 2018		Incubaceae	Germany	Saxony-Anhalt	Harz	Brocken, Umgebung der Teufelskanzel	1120	51° 47' 51,39''	10°36' 54,39''	51,7975 N 10,615 E	2014-06-20	E. Hörandl & G. Karste	GOET	PRJNA433286
EH10223	Salix repens	Wagner et al 2018		Incubaceae	Norway	Rogaland	Strand	Holtaheia, Parkplatz	370	59°05'35,3''	6°02'48,6''	59,09306 N 6,04667 E	2014-08-18	E. Hörandl, S. Hörandl, F. Hadacek	GOET	PRJNA433286
EH10227	Salix repens	Wagner et al 2018		Incubaceae	Norway	Rogaland	Strand	Nes, Viglesdalen, Wasserfall Hiafossen	335	59°09'05,3''	6°23'27,9''	59,15139 N 6,39083 E	2014-08-19	E. Hörandl, S. Hörandl, F. Hadacek	GOET	PRJNA433286
EH10451	Salix repens_rosmarinifolia			Incubaceae	Finland	S-Finland		Lahnajärvi	60	60° 23' 3,9'' N,	23° 41' 59,9'' E	60,38417 N 23,69972 E	2018-05-19	E. Hörandl & F. Hadacek	GOET	PRJNA433286
T10	Salix reticulata	Wagner et al 2018		Chamaetia	Austria	Tyrol	Ötztal Alps	Ötztal, Rotmoostal	2400	46°49,895`	11°02,430`	46,84139 N 11,04528 E	2014-08-01	A. Danler	GOET	PRJNA433286
T25	Salix reticulata	Wagner et al 2018		Chamaetia	Austria	Tyrol	Ötztal Alps		2400	46°49,932`	11°02,397`	46,8425 N 11,04417 E	2014-08-01	A. Danler	GOET	PRJNA433286
W18003	Salix reticulata			Chamaetia	Finland	Kuusamo			n.a.	66°22'12.3"N	29°18'44.1"E	66,37 N 29,31222 E	2018-06-10	T. Nyman	GOET	PRJNA433286
EH10398	Salix retusa	this study		Retusae	Italy	Prov. Sondrio	Livigno Alps	Valdidentro, Monte delle Scale	2382	46°30'11,2 N,	10°19'39,9 E	46,50306 N 10,3275 E	2017-07-30	E. Hörandl, S. Hörandl, F. Hadacek	GOET	PRJNA433286
NW17.076	Salix retusa	this study		Retusae	Austria	Lower Austria	Puchberg am Schneeberg	Rundweg "Schöne Blicke", nahe Bergstation	1807	47°45.489	15°49.916	47,76333 N 15,84194 E	2017-08-09	N.Wagner, K. Scheufler	GOET	PRJNA433286
EH10408	Salix retusa	this study		Retusae	Italy	Prov. Sondrio	Sobretta-Gavia-Group	Santa Caterina, Laghetto dell'Alpe	2738	46°23'16,0 N,	10°28'05,6 E	46,38778 N 10,46806 E	2017-08-03	E. Hörandl, S. Hörandl, F. Hadacek	GOET	PRJNA433286
HL130	Salix rosmarinifolia	He et al 2020		Incubaceae	China	Heilongjian	Daxinganling		390	52.2925	124.663	52,29249 N 124,66262 E	2017-08-12	L. He, J. Zhao, W.C. Hou, G.R. Zhou	FJFC & GOET	PRJNA433286
EH10520	Salix salviifolia	Wagner et al 2020		Vetrix	Spain	Leon	Cordillera Cantabrica	Vegacierneja N von Riaño	1117	43°1'45.1'	5°01'03.4''W	43,02917 N 5,0175 W	2018-07-23	E. Hörandl & F. Hadacek	GOET	PRJNA433286
EH10521	Salix salviifolia	Wagner et al 2020		Vetrix	Spain	Leon	Cordillera Cantabrica	Vegacierneja N von Riaño	1117	43°1'45.1'	5°01'03.4''W	43,02917 N 5,0175 W	2018-07-23	E. Hörandl & F. Hadacek	GOET	PRJNA433286
HL116-1	Salix schwerinii	Wagner et al 2020		Vimen	China	Heilongjian	Daxinganling, Tahe County, 516 Fire Tower		472	52°21'7.55	124°51'10.31	52,35194 N 124,85278 E	2017-08-11	Li He, Wancheng Hou, Gongru Zhou	GOET	PRJNA433286
HL116-2	Salix schwerinii	Wagner et al 2020		Vimen	China	Heilongjian	Daxinganling, Tahe County, 516 Fire Tower		472	52°21'7.55	124°51'10.31	52,35194 N 124,85278 E	2017-08-11	Li He, Wancheng Hou, Gongru Zhou	GOET	PRJNA433286
HL118	Salix schwerinii	Wagner et al 2020		Vimen	China	Heilongjian	Daxinganling, Tahe County, Shisanzhixian		403	52°26'25.42	124°50'50.67	52,44028 N 124,84722 E	2017-08-11	Li He, Wancheng Hou, Gongru Zhou	GOET	PRJNA433286
T12	Salix serpillifolia	Wagner et al 2018		Retusae	Austria	Tyrol	Ötztal Alps	Ötztal, Langtal	2500	46°48`40.2``	11°00`09.6``	46,81111 N 11,0025 E	2014-07-01	A. Danler	GOET	PRJNA433286
T20	Salix serpillifolia	Wagner et al 2018		Retusae	Austria	Tyrol	Ötztal Alps		2500	46°48`40.2``	11°00`09.6``	46,81111 N 11,0025 E	2014-07-01	A. Danler	GOET	PRJNA433286
T23	Salix serpillifolia	Wagner et al 2018		Retusae	Austria	Tyrol	Ötztal Alps		2400	46°48`40``	11°00`09``	46,81111 N 11,0025 E	2014-08-01	A. Danler	GOET	PRJNA433286
W18008	Salix starkeana	Wagner et al 2020		Vetrix	Finland	Kuusamo			n.a	66°22'12.3"N	29°18'44.1"E	66,37 N 29,31222 E	2018-06-11	T. Nyman	GOET	PRJNA433286
EH10312	Salix triandra	Wagner et al 2018		Amygdalinae	Germany	Thuringia	Kyffhäuser		155	51° 25' 18,0''	10°59' 59,3''	51,42167 N 10,99972 E	2016-05-05	E. Hörandl	GOET	PRJNA433286
1	Salix triandra	Wagner et al 2018		Amygdalinae	Germany	Lower Saxony	Leinetal		175	51°28'14.6''	9°57'38.7''	51,47056 N 9,96056 E	2016-07-01	S. Gramlich	GOET	PRJNA433286
2	Salix triandra	Wagner et al 2018		Amygdalinae	Germany	Lower Saxony	Leinetal		175	51°28'14.6''	9°57'38.7''	51,47056 N 9,96056 E	2016-07-01	S. Gramlich	GOET	PRJNA433286
EH10313	Salix triandra	Wagner et al 2018		Amygdalinae	Germany	Lower Saxony	Leinetal		179	51° 28' 15,53''	9°56' 57,54''	51,47083 N 9,94917 E	2016-05-21	E. Hörandl	GOET	PRJNA433286
EH10159	Salix viminalis	Wagner et al 2018		Vimen	Germany	Saxony-Anhalt	Kyffhäuser	Helmestausee bei Berga	155	51° 25' 29,2''	10°59' 05,4''	51,42472 N 10,98472 E	2014-05-18	E. Hörandl	GOET	PRJNA433286
EH10145	Salix viminalis	Wagner et al 2018		Vimen	Germany	Lower Saxony	Leinetal	Teiche bei Rethe S von Hannover	70	52° 16' 23,2''	9°48' 33''	52,27306 N 9,80917 E	2014-03-30	E. Hörandl, S. Hörandl, F. Hadacek	GOET	PRJNA433286
EH10146	Salix viminalis	Wagner et al 2018		Vimen	Germany	Lower Saxony	Leinetal	Teiche bei Rethe S von Hannover	70	52° 16' 15,9''	9°48' 36,8''	52,27083 N 9,81 E	2014-03-30	E. Hörandl, S. Hörandl, F. Hadacek	GOET	PRJNA433286
EH10147	Salix viminalis	Wagner et al 2018		Vimen	Germany	Lower Saxony	Leinetal	Teiche bei Rethe S von Hannover	70	52° 16' 15,9''	9°48' 36,8''	52,27083 N 9,81 E	2014-03-30	E. Hörandl, S. Hörandl, F. Hadacek	GOET	PRJNA433286
NW17.018	Salix waldsteiniana	Wagner et al 2020		Arbusculae	Austria	Styria	Altaussee	Loser	1777	47°39.901	13°46.930	47,675 N 13,7925 E	2017-08-03	N. Wagner, K. Scheufler	GOET	PRJNA433286
NW17.063	Salix waldsteiniana	Wagner et al 2020		Arbusculae	Austria	Lower Austria	Lassing	Hochkar	1553	47°42.997	14°55.040	47,7275 N 14,91778 E	2017-08-07	N. Wagner, K. Scheufler	GOET	PRJNA433286
NW17.069	Salix waldsteiniana	Wagner et al 2020		Arbusculae	Austria	Lower Austria	Reichenau an der Rax	Raxalpe	1551	47°43.021	15°46.562	47,71722 N 15,78222 E	2017-08-08	N. Wagner, K. Scheufler	GOET	PRJNA433286
																*raw reads of new samples were added to the existing bioproject on NCBI SRA

## Sheet: ipyrad_statistics
Wagner et al., 2023
Statistics ipyrad runs
m15 backbone
species ID	reads_raw	reads_passed_filter	clusters_total	clusters_hidepth	hetero_est	error_est	reads_consens	loci_in_assembly
S_alpina_NW17_067	4722192	4721147	100289	87337	0.011373	0.001165	82184	17590
S_alpina_NW17_068	5973920	5972756	98798	88233	0.012599	0.001061	82525	18538
S_alpina_NW17_075	5479671	5478567	115179	100730	0.010714	0.001044	95438	17842
S_apennina_EH11051	9511065	9508272	141894	116172	0.025427	0.002417	99900	25980
S_apennina_EH11052	9777333	9774497	148736	120188	0.025624	0.002492	102914	26667
S_apennina_EH11075	27292104	27283550	179143	129986	0.029263	0.002235	105590	29046
S_apennina_EH11076	8696813	8694273	135335	109454	0.027463	0.002551	92443	25943
S_appendiculata_24	10782939	10673228	220708	102471	0.016812	0.001518	92453	21206
S_appendiculata_51	10357855	10227454	242519	105031	0.016214	0.001509	95313	20881
S_appendiculata_PM20028	8954764	8952134	106638	87872	0.014284	0.001691	81331	20473
S_atrocinerea_EH_10505	5005148	5003399	132066	111466	0.012843	0.001916	103862	18759
S_atrocinerea_EH_10526	3613959	3612673	113866	95063	0.012581	0.00213	88615	17745
S_atrocinerea_EH_10528	2618779	2617974	88949	74870	0.012786	0.001837	69738	16121
S_aurita_EH_10179	7394540	7392994	96886	87342	0.012695	0.001076	81558	19297
S_aurita_EH_10377	3357186	3356364	82558	72760	0.012432	0.00117	68251	16814
S_aurita_NW17_002	4503480	4502408	82411	73646	0.01262	0.001111	68797	17384
S_aurita_NW17_055	3808733	3807938	111139	95381	0.010175	0.001151	90725	17100
S_bicolor_10170	11617817	11508426	221319	121882	0.030249	0.002546	97879	27339
S_bicolor_10180	11639704	11510190	209311	119623	0.029816	0.002392	96184	27232
S_bicolor_BICambur	12413156	12409796	149929	121320	0.02511	0.002075	103729	27239
S_bicolor_BICchad1	12114563	12111158	150886	119236	0.023748	0.002114	103773	26353
S_bicolor_BICchad2	13133694	13130166	136499	110425	0.025721	0.001941	94507	26675
S_bicolor_NW17_040	3189593	3188926	83642	73485	0.018912	0.001456	66982	17915
S_bicolor_NW17_048	3631497	3630852	86606	76821	0.019187	0.00141	69585	18656
S_breviserrata_10265	4334629	4129655	148318	87207	0.01544	0.001605	79737	19723
S_breviserrata_10276	5534166	5420730	139712	87967	0.014627	0.001555	80571	20071
S_breviserrata_EH_10508	4441155	4439934	82081	71533	0.01003	0.001631	67226	16666
S_caesia_EH_10390	7558282	7556394	104231	89878	0.018474	0.001892	80344	20122
S_caesia_EH_10416	6191551	6190433	93940	84517	0.017466	0.001348	76685	19278
S_caesia_EH_10421	9002597	9000757	103123	92701	0.019888	0.00132	82822	20887
S_cantabrica_EH10515	11624173	11620978	138181	110225	0.026489	0.00216	93934	26611
S_cantabrica_EH_10491	7702828	7700315	122326	102843	0.022359	0.00232	89379	22438
S_cantabrica_EH_10497	7163435	7161111	113886	96442	0.023611	0.002424	82882	22579
S_cantabrica_cf_EH_10506	5658127	5656203	114495	96743	0.021251	0.002263	84971	21033
S_caprea_EH_10151	5510091	5508949	84201	76572	0.012352	0.001109	71630	17642
S_caprea_EH_10164	6197331	6195979	86961	79332	0.012902	0.001062	73922	18471
S_caprea_EH_10169	8013142	8010934	92868	83562	0.013146	0.001101	77547	18973
S_ceretana_EH_10319	2102212	2101760	72868	61653	0.016343	0.001406	56933	15226
S_cinerea_EH_10328	22480803	22473498	136417	108506	0.023778	0.001761	92472	25393
S_cinerea_EH_10468	3587082	3585833	88621	75701	0.017224	0.001876	68826	17786
S_cinerea_NW17_009	19489781	19482854	133853	105379	0.021456	0.001849	91726	23591
S_cinerea_NW17_082	5974843	5973760	136577	117278	0.014636	0.001315	109130	20089
S_daphnoides_10263	5408961	5302598	138912	85465	0.011087	0.001583	79085	19086
S_daphnoides_10290	4509253	4414011	209117	90311	0.012382	0.001735	82718	18783
S_daphnoides_8	9218091	9108762	204279	91925	0.011871	0.001535	84095	19333
S_eleagnos_10255	2992365	2888016	161803	83659	0.011549	0.00175	77385	17574
S_eleagnos_EH_10495	6097036	6094803	99096	85141	0.00853	0.001581	80646	16526
S_eleagnos_T1	9193192	9065679	171784	90394	0.010401	0.001402	83539	18941
S_foetida_10273	10213513	10088423	227388	105268	0.017104	0.001458	95130	21728
S_foetida_35_2014	10165720	10066727	180695	100872	0.016517	0.001475	91568	21849
S_foetida_36_2014	10105392	9955130	215287	99823	0.016153	0.001496	89953	21728
S_foetida_43	8942690	8839640	175345	97239	0.01562	0.001487	88604	21343
S_gracilistylia_HL133-1	5841360	5840337	97186	86507	0.010011	0.001074	81577	17158
S_gracilistylia_HL133-2	4474007	4473067	85928	76536	0.010231	0.001153	72185	16336
S_gussonei_TS1076	4538664	4536975	84866	73419	0.010771	0.001715	68653	17036
S_hastata_10195	8268742	8137771	193964	100927	0.018218	0.00176	90502	20254
S_hastata_10269	4095588	4006276	147420	87206	0.015778	0.001705	79549	18820
S_hegetschweileri_23_2014	12508563	12504985	127574	106034	0.02578	0.002502	89019	25248
S_hegetschweileri_30_2014	3817763	3816713	95622	81159	0.020806	0.002204	71919	19434
S_helvetica_1_2014	10828700	10631090	213022	99645	0.016706	0.00146	89829	21618
S_helvetica_44_1	5132610	4739413	193202	93435	0.017983	0.001729	84092	20925
S_helvetica_6	11995578	11843564	198370	100022	0.017225	0.001462	90153	21991
S_helvetica_T9	11291933	11033058	215847	100290	0.017288	0.001514	89876	21669
S_herbacea_10206	10684684	10516681	275177	120577	0.017704	0.001529	107735	20534
S_herbacea_10216	12169206	12020003	199087	102691	0.020666	0.001592	90335	21931
S_herbacea_25_2014	9873793	9758871	195902	99955	0.016296	0.001388	90459	20551
S_herbacea_28_2014	8499119	8371551	319533	125370	0.016168	0.001573	113099	20569
S_integra_HL66-1	2755193	2754671	77267	68130	0.009771	0.001154	64454	15481
S_integra_HL72-1	3975625	3974873	80320	73066	0.009079	0.001088	69072	16710
S_integra_HL72-2	3978126	3977169	94226	83000	0.008085	0.001072	79116	16372
S_kaptarae_NW20001	7552396	7550123	112085	95075	0.01987	0.001688	85486	22675
S_laggeri_EH10852	8192475	8190171	127457	108658	0.021144	0.001546	97995	23193
S_laggeri_EH10950	8256462	8253993	117849	99853	0.020861	0.001644	89669	22800
S_laggeri_EH_10385	3203314	3202675	84232	73345	0.01704	0.001455	67206	17344
S_lanata_EH_10209	4219542	4218837	95306	83925	0.013103	0.001148	78728	16278
S_lanata_EH_10215	2557106	2556590	72292	62354	0.009733	0.001166	59165	13257
S_lapponum_EH_10183	4057960	4057247	90843	80863	0.010738	0.001155	76401	17347
S_lapponum_EH_10199	4690940	4690025	89837	80372	0.011696	0.001123	75505	17966
S_lapponum_EH_10232	4475324	4474414	93195	82936	0.011322	0.001157	78173	17781
S_mielichhoferi_NW17_044	9169173	9166482	127921	107139	0.024722	0.002596	91055	23522
S_mielichhoferi_NW17_045	11813492	11809955	135868	111374	0.025353	0.002623	93583	24637
S_myrsinifolia_EH_10392	5451724	5450016	106530	89932	0.022712	0.00248	78563	20906
S_myrsinifolia_NW17_057	3654646	3653398	104303	87426	0.018476	0.002123	78730	18753
S_jenisseensis_cf_RUS2010	7275871	7273482	131493	106807	0.028499	0.002213	90783	25553
S_myrsinites_W18004	6661483	6659183	116261	97172	0.024343	0.002802	82149	22060
S_nummularia_HL134-1	2701872	2701287	73273	63649	0.011474	0.001168	59973	15127
S_nummularia_HL134-2	2930815	2930259	78944	68043	0.011191	0.001184	64337	15390
S_nummularia_HL134-4	2068067	2067609	66358	55610	0.011758	0.001338	52362	13127
S_pedicellata_TS1074	5313248	5311526	86981	75541	0.011401	0.001651	70292	17524
S_phylicifolia_EH_10197	7782619	7780422	115053	97570	0.024216	0.002408	83879	23147
S_phylicifolia_EH_10467	9138581	9136080	115722	98006	0.024269	0.002286	84131	23559
S_phylicifolia_W18005	5274463	5272670	106300	89515	0.021788	0.002252	78519	20856
S_polaris_SK_475	6121991	6120416	103773	88473	0.021295	0.002093	78145	19741
S_polaris_SK_513	5565700	5564132	108318	92689	0.018397	0.001873	83846	19211
S_polaris_SK_652	6314209	6312396	104942	90127	0.019241	0.001984	80738	19838
S_polaris_SK_727	7969706	7967264	112959	96066	0.02052	0.002098	85220	20513
S_purpurea_10154	8570717	8468042	187433	93713	0.01378	0.00155	85243	20044
S_purpurea_10181	9621403	9458277	222790	98147	0.015829	0.001562	88458	20280
S_purpurea_14	6293394	6165560	176712	90357	0.012073	0.001533	83206	19140
S_purpurea_8_2014	8259841	8055905	175277	90641	0.012598	0.00153	82990	19631
S_purpurea_lambertiana_TS1077	7528381	7526183	93000	80525	0.01057	0.00153	75094	17781
S_pyrenaica_EH_10321	5155645	5154705	87370	78760	0.011933	0.001088	73678	17323
S_pyrenaica_EH_10322	6348328	6347008	87768	79784	0.012869	0.00109	74211	17919
S_pyrenaica_EH_10326	4350594	4349767	81159	73097	0.012006	0.001124	68529	16489
S_pyrolifolia_HL119-1	5997104	5995860	89289	81156	0.011918	0.001089	76006	18150
S_pyrolifolia_HL122-2	6862309	6860991	102522	91814	0.011194	0.001042	86217	18568
S_pyrolifolia_RUS1622	8323876	8320053	105646	88594	0.014966	0.001322	81787	19796
S_pyrolifolia_W18001_b	6674191	6672428	87828	76783	0.010123	0.001489	71885	17393
S_pyrolifolia_W18002	6384983	6382709	87273	75473	0.010525	0.00163	70585	17183
S_rehderiana_HL81	4075653	4074682	81514	73443	0.010218	0.001116	69341	17130
S_rehderiana_HL85-1	4963351	4962168	87026	77992	0.009408	0.001128	73656	17800
S_rehderiana_HL85-2	5294773	5293942	95870	85845	0.009019	0.001098	81481	18127
S_rehderiana_HL85-3	3162123	3161638	73136	65557	0.009414	0.001109	62129	16091
S_repens_10177	11581582	11163868	336869	112063	0.019048	0.001619	98869	20642
S_repens_10223	10511768	10288347	484074	170029	0.015996	0.001671	154530	21019
S_repens_10227	7746319	7473515	213406	101505	0.015127	0.00154	92779	20476
S_repens_rosmarinifolia_EH_10451	3537804	3535607	81827	70622	0.011826	0.001822	65810	16252
S_reticulata_T10	6134219	5989775	194291	91423	0.01243	0.001607	84300	18032
S_reticulata_T25	7227689	7121991	152728	86278	0.011648	0.001501	79672	18167
S_reticulata_W18003	9050694	9048068	90088	77383	0.01038	0.001587	72330	16637
S_retusa_EH_10398	6092300	6090012	115678	97016	0.021013	0.00232	85441	20100
S_retusa_EH_10408	3572535	3571413	90634	76450	0.019475	0.002158	68551	17351
S_retusa_NW17_076	9544386	9541467	124564	104722	0.022261	0.002467	91097	21959
S_rosmarinifolia_HL130	4843416	4842278	94156	83768	0.012639	0.00121	78361	17611
S_salviifolia_EH_10520	7572142	7569703	136268	115632	0.009647	0.001648	109700	18140
S_salviifolia_EH_10521	6374664	6372609	101217	86809	0.011274	0.001597	81140	18215
S_schwerinii_HL116-1	6227239	6226266	87321	79516	0.012416	0.001109	74299	18575
S_schwerinii_HL116-2	3297880	3297115	78395	68712	0.011197	0.00118	64750	15875
S_schwerinii_HL118	4560650	4559931	82002	74405	0.011969	0.001101	69818	17741
S_serpillifolia_T12	6903197	6548735	432055	127202	0.015941	0.001813	114497	18638
S_serpillifolia_T20	7699942	7487155	382875	137057	0.013435	0.001659	125981	18795
S_serpillifolia_T23	5510841	5409582	564710	208752	0.017614	0.002059	185297	17941
S_starkeana_cinarensis_W18008	2997675	2996601	77845	66543	0.011607	0.001823	62298	15293
S_triandra_1	8563938	8395880	196573	94368	0.013836	0.001588	86544	15760
S_triandra_10312	4425905	4309018	219755	91576	0.014285	0.001798	83804	15364
S_triandra_10313	10501682	10369273	220724	97292	0.01406	0.001478	88950	15950
S_triandra_2	11811300	11632191	233005	100639	0.014525	0.001461	92009	16061
S_viminalis_10145	10953545	10629078	227348	96722	0.014661	0.001559	87774	20633
S_viminalis_10146	9499090	9185920	192291	90915	0.013803	0.001492	83100	20351
S_viminalis_10147	15239774	15031564	173521	91144	0.013979	0.00136	83105	20930
S_viminalis_10159	8968963	8707910	167891	90688	0.013038	0.00148	83074	20799
S_waldsteiniana_NW17_018	1046667	1046517	32809	27327	0.01082	0.001227	25881	7120
S_waldsteiniana_NW17_063	4231395	4230432	85866	76571	0.013248	0.001157	71619	18066
S_waldsteiniana_NW17_069	4599077	4598084	84992	75978	0.012887	0.001212	71037	17990
m29 - Nigricantes ingroup
species ID	reads_raw	reads_passed_filter	clusters_total	clusters_hidepth	hetero_est	error_est	reads_consens	loci_in_assembly
S_apennina_EH11051	9511065	9508706	167980	125054	0.021563	0.00206	111611	8164
S_apennina_EH11075	27292104	27285148	233490	144532	0.024363	0.002001	122926	8164
S_hegetschweileri_23_2014	12508563	12506298	146594	113899	0.021231	0.002229	99846	8164
S_hegetschweileri_30_2014	3817763	3817127	103583	84941	0.016903	0.00195	77956	8164
S_hegetschweileri_EH10243	18310153	18251456	175515	127775	0.026033	0.001604	107459	8164
S_hegetschweileri_EH10884	10128795	10126372	160881	121011	0.021674	0.001765	108234	8164
S_hegetschweileri_EH10387	10749585	10747439	138378	110241	0.021325	0.00212	97443	8164
S_mielichhoferi_EH10642	7118954	7117298	155994	115106	0.022126	0.002226	102544	8164
S_mielichhoferi_EH10643	6919337	6915916	159815	120892	0.021757	0.001937	108233	8164
S_mielichhoferi_EH10682	8707340	8705328	169316	128626	0.022179	0.001995	114232	8164
S_mielichhoferi_EH10774	9109083	9107045	164980	123673	0.021973	0.001988	110144	8164
S_mielichhoferi_NW17036	9873821	9871484	168696	122270	0.022372	0.00207	108645	8164
S_mielichhoferi_NW17046	8757684	8755706	159500	124787	0.022005	0.001852	111547	8164
S_mielichhoferi_NW17_043	5231664	5230618	130832	106420	0.015945	0.002222	97414	8164
S_mielichhoferi_NW17_044	9169173	9167564	144269	114431	0.020487	0.002281	101308	8164
S_mielichhoferi_NW17_045	11813492	11811219	155264	119414	0.020733	0.002342	104697	8164
S_mielichhoferi_cf_EH10541	6377215	6375800	138299	109159	0.021936	0.001843	97814	8164
S_myrsinifolia_EH10208	28815105	28728743	187681	134035	0.027364	0.001294	110397	8164
S_myrsinifolia_EH10260	18516747	18456472	160124	123210	0.025072	0.001508	104190	8164
S_myrsinifolia_EH10849	7707921	7706003	143859	111444	0.021282	0.001818	100224	8164
S_myrsinifolia_EH_10236	6649895	6569826	213512	119467	0.025099	0.002468	101812	8164
S_myrsinifolia_EH_10349	16439997	16436357	164413	119120	0.021803	0.002182	103446	8164
S_myrsinifolia_EH_10392	5451724	5450680	116918	94705	0.018654	0.002169	85879	8164
S_myrsinifolia_EH_10415	8800271	8798671	127898	103518	0.019919	0.002108	92509	8164
S_myrsinifolia_NW17010	8118415	8116509	151593	117749	0.021724	0.001747	105884	8164
S_myrsinifolia_NW17_032	3418237	3417603	99921	81831	0.016626	0.001988	75338	8164
S_myrsinifolia_NW17_054	2805664	2804590	97230	78791	0.014693	0.001942	73452	8164
S_myrsinifolia_NW17_057	3654646	3653884	111826	91015	0.015153	0.001937	84577	8164
S_jenisseensis_cf_RUS2010	7275871	7273865	154528	114630	0.022947	0.002003	101583	8164
m10 Phylicifoliae ingroup
species ID	reads_raw	reads_passed_filter	clusters_total	clusters_hidepth	hetero_est	error_est	reads_consens	loci_in_assembly
S_bicolor_10170	11617817	11515482	224896	121937	0.030241	0.002563	98380	26183
S_bicolor_10180	11639704	11516937	212785	119677	0.030186	0.002387	96685	26121
S_bicolor_BICambur	12413156	12410207	150066	121336	0.02511	0.002075	104049	25639
S_bicolor_BICchad1	12114563	12111626	151046	119250	0.023748	0.002114	104028	25944
S_bicolor_BICchad2	13133694	13130626	136648	110435	0.025721	0.001941	94778	25875
S_bicolor_NW17_040	3189593	3189127	83732	73491	0.018906	0.001457	67039	23518
S_bicolor_NW17_048	3631497	3631032	86694	76823	0.019172	0.00141	69663	24275
S_phylicifolia_EH_10197	7782619	7781137	115455	97592	0.024289	0.002412	84110	25819
S_phylicifolia_EH_10217	10791307	10789340	123057	101546	0.023887	0.002282	87102	25935
S_phylicifolia_EH_10452	8523537	8521847	115986	97884	0.02412	0.002282	84224	25837
S_phylicifolia_EH_10467	9138581	9136974	116127	98015	0.023887	0.002282	84359	25748
S_phylicifolia_W18005	5274463	5273243	106581	89527	0.021788	0.002252	78673	25065

## Sheet: morphology
Wagner et al., 2023
Morphological character measurements
specimen	individual	Country	locality	coordinates	collector	date	herbarium	no_leaves	Population	clade	taxon	accepted species	length_mean	width-mean	L:W means	angle_mean	teeth mean	stipules_mean	hairs_mean
EH10180	1	Germany	Harz, Brocken (loc. class.)	10°36' 54,08 E, 51° 47' 59,55" N	E. Hörandl	2014-06-20	GOET	8	1	1	bicolor	phylicifolia	29.125	12.0625	2.51121	57.875	0.0375	0.936765	8.375
EH10170	2	Germany	Harz, Brocken (loc. class.)	10°37' 11,43 E, 51° 47' 59,99" N	E. Hörandl	2014-06-20	GOET	8	1	1	bicolor	phylicifolia	32	12	2.68693	56.5	0.0125	0.741912	16.125
Ehrh. 118 Type	3	Germany	Harz, Brocken (loc. class.)	10°37' E 51°47' N	J.F. Ehrhart	-	GOET	1	1	1	bicolor	phylicifolia	40	20	2	76	0.1	1	47
Ehrhart 1780-82	4	Germany	Harz, Brocken (loc. class.)	10°37' E 51°47' N	J.F. Ehrhart	1780-1782	GOET	8	1	1	bicolor	phylicifolia	30.125	12.125	2.49987	58	0.125	0.803676	8.125
Kampe 1836	5	Germany	Harz, Brocken (loc. class.)	10°37' E 51°47' N	C. Kampe	1836	GOET	8	1	1	bicolor	phylicifolia	24.625	9.125	2.78581	51.5	0.0375	0.886765	77.625
Meyer 1856	6	Germany	Harz, Brocken (loc. class.)	10°37' E 51°47' N	G.F.W.Meyer	1856	GOET	8	1	1	bicolor	phylicifolia	41.375	19.625	2.10009	80.625	0	0.847059	46.875
NW17.048	7	Austria	Alps, Dr. Josef-Mehrlhütte	13°46' 431'' E, 46°58' 672'' N	N. Wagner	2017-08-04	GOET	8	2	2	bicolor	phylicifolia	30.5	10.75	2.84611	56.375	0.0125	0.6	20.25
NW17.040	8	Austria	Alps, Dr. Josef-Mehrlhütte	13°46' 51'' E, 46°58' 70'' N	N. Wagner	2017-08-04	GOET	5	2	2	bicolor	phylicifolia	29.2	10.4	2.8254	61.8	0.06	0.56	18.4
EH234	9	Austria	Alps, Dr. Josef-Mehrlhütte	13°46' E, 46°58' N	E. Hörandl	1990-07-16	WU	8	2	2	bicolor	phylicifolia	32.125	12.5	2.60223	54	0.0125	0.6375	27.25
EH376	10	Austria	Alps, Dr. Josef-Mehrlhütte	13°46' E, 46°58' N	E. Hörandl	1990-09-11	WU	8	2	2	bicolor	phylicifolia	30.125	10.75	2.8017	52.375	0	0.6625	38.125
EH372	11	Austria	Alps, Dr. Josef-Mehrlhütte	13°46' E, 46°58' N	E. Hörandl	1990-09-11	WU	8	2	2	bicolor	phylicifolia	36.25	15.625	2.31989	61.625	0	0.525	9.5
EH238	12	Austria	Alps, Dr. Josef-Mehrlhütte	13°46' E, 46°58' N	E. Hörandl	1990-07-16	WU	8	2	2	bicolor	phylicifolia	31.875	12.5	2.55307	56.875	0.025	0.6	0
BiCambur	13	Switzerland	Jura, Les Amburnex	6.2312233 E, 46.54619526 N	C. Bornand	2021-09-13	GOET	8	3	3	bicolor	phylicifolia	34.25	14.75	2.33385	71.375	0.0625	0	5
Bichad1	14	Switzerland	Alps, Grandvillard	7.10093728 E, 46.50038121 N	C. Bornand	2014-08-22	GOET	8	4	3	bicolor	phylicifolia	34.5	14.125	2.44083	62.875	0.1375	0.6	2.5
Bichad2	15	Switzerland	Alps, Grandvillard	7.10082432 E, 46.50060758 N	C. Bornand	2021-09-17	GOET	8	4	3	bicolor	phylicifolia	40.875	19.125	2.13202	69.25	0	0.6	1.5
EH10197	16	Norway	Dovrefjell	9°16'47,7'' E, 62°07'09,7'' N	E. Hörandl	2014-08-07	GOET	8	5	4	phylicifolia	phylicifolia	37.375	11.75	3.17404	49.625	0.3	0.75	0
EH10192	17	Norway	Dovrefjell	9°16'47,7'' E, 62°07'09,7'' N	E. Hörandl	2014-08-07	GOET	8	5	4	phylicifolia	phylicifolia	31	12.375	2.55798	61.375	0.225	0	0
EH10196	18	Norway	Dovrefjell	9°16'47,7'' E, 62°07'09,7'' N	E. Hörandl	2014-08-07	GOET	8	5	4	phylicifolia	phylicifolia	22.125	7.5	2.94345	44.25	0.2125	0	0
EH10217	19	Norway	Myrdal	7°06'24,4'' E, 60°43'33,4'' N	E. Hörandl	2014-08-14	GOET	8	6	4	phylicifolia	phylicifolia	43.875	12.375	3.56277	50.25	0.2375	0	0
EH10467	20	Finland	Nagu	22° 01' 37,5'' E, 60° 10' 29,8'' N	E. Hörandl	2018-05-23	GOET	8	7	4	phylicifolia	phylicifolia	36	17	2.13004	67.625	0.175	0.878	5.375
EH10452	21	Finland	Lahnajärvi	23° 41' 59,9'' E, 60° 23' 3,9'' N	E. Hörandl	2018-05-19	GOET	8	8	4	phylicifolia	phylicifolia	34.125	16.5	2.09982	65.3125	0.1125	1.04525	0
Breckle77	22	Sweden	Abisko	18° 49' E, 68°20 N	Breckle	1965-08-06	GOET	6	9	4	phylicifolia	phylicifolia	45.1667	17.3333	2.66514	56.1667	0.183333	0.916667	0
EH10884	23	Switzerland	Urserental, loc. class.	8°31'25.0" E, 46°36'22.0" N,	E. Hörandl	2020-07-28	GOET	8	10	5	hegetschweileri	hegetschweileri	40	17.875	2.30166	64	0.375	4.4	0
EH10885	24	Switzerland	Urserental, loc. class.	8°31'25.0" E, 46°36'22.0" N,	E. Hörandl	2020-07-28	GOET	8	10	5	hegetschweileri	hegetschweileri	36.125	18.125	1.98852	82.125	0.3375	3.8	0
EH45	25	Switzerland	Urserental, loc. class.	8°30' E, 46° 30 N	E. Hörandl	1990-07-07	WU	8	10	5	hegetschweileri	hegetschweileri	55.25	21.875	2.54409	79.375	0.35	4.2125	0
Baenitz Hb. Eur. WU	26	Switzerland	Urserental, loc. class.	8°31' E, 46° 36' N	O. Buser	1880-1881	WU	5	10	5	hegetschweileri	hegetschweileri	68.8	26.6	2.60275	87.2	0.32	4.4	0
Buser 1882 GOET	27	Switzerland	Urserental, loc. class.	8°31' E, 46° 36' N	O. Buser	1882	GOET	8	10	5	hegetschweileri	hegetschweileri	49.375	21.375	2.36817	80.25	0.45	3.775	0
Buser 1881	28	Switzerland	Urserental, loc. class.	8°31' E, 46° 36' N	O. Buser	1881	WU	8	10	5	hegetschweileri	hegetschweileri	60.625	26.75	2.32985	105.25	0.9625	4.7	0
Buser 1881	29	Switzerland	Urserental, loc. class.	8°31' E, 46° 36' N	O. Buser	1881	WU	8	10	5	hegetschweileri	hegetschweileri	66.375	24.75	2.69549	81.125	0.4375	4.4	0
EH59	30	Switzerland	Urserental, loc. class.	8°33' E, 46° 37' N	E. Hörandl	1990-07-07	WU	8	10	5	hegetschweileri	hegetschweileri	64.625	28.25	2.30735	86.75	0.325	5.5	0
23/2014	31	Switzerland	Gletschboden	08°22', 46°34''	S. Gramlich	2014-07-17	GOET	8	11	5	hegetschweileri	hegetschweileri	45.75	17.25	2.6845	68.125	0.35	2.064	0
30/2014	32	Switzerland	Gletschboden	08°22', 46°34''	S. Gramlich	2014-07-17	GOET	5	11	5	hegetschweileri	hegetschweileri	25.4	11.6	2.19124	61.4	0.24	1.9212	0
EH9754	33	Switzerland	Gletschboden	8° 22' 11.6" E, 46° 33' 01.0" N	E. Hörandl	2009-07-07	GOET	8	11	5	hegetschweileri	hegetschweileri	47	20.125	2.33165	68.25	0.2	2.1515	0
EH9756	34	Switzerland	Gletschboden	8° 22' 12,5" E, 46° 33' 01,7" N	E. Hörandl	2009-07-07	GOET	8	11	5	hegetschweileri	hegetschweileri	40	16.75	2.39789	61.5	0.5375	2.03313	0
Toepffer 470	35	Switzerland	Gletschboden	8°22 E, 46°33' N	A. Toepffer	-	WU	8	11	5	hegetschweileri	hegetschweileri	53.5	23.875	2.238	76.375	0.3375	2.04638	0
EH10243	36	Austria	Obergurgl	11°01'02,9'' E, 46°51'44,8'' N	E. Hörandl	2015-07-26	GOET	8	12	6	hegetschweileri	hegetschweileri	30.875	13.125	2.35691	66	0.325	4.26325	0
EH10533	37	Austria	Obergurgl	11°, 01', 05,0" E, 46° 51' 42,4" N	E. Hörandl	2019-07-28	GOET	6	12	6	hegetschweileri	hegetschweileri	87.3333	29.1667	3.03552	72.5	0.333333	4.829	0
EH10242	38	Austria	Obergurgl	11°01'02,2'' E, 46°51'43,3'' N	E. Hörandl	2015-07-26	GOET	8	12	6	hegetschweileri	hegetschweileri	52.75	22	2.43675	72.625	0.2625	6.01975	0
EH174	39	Austria	Obergurgl	11°01' E, 46°51' N	E. Hörandl	1990-07-07	WU	8	12	6	hegetschweileri	hegetschweileri	50.25	20.5	2.46179	67.5	0.4625	3.5645	0
EH10387	40	Austria	Obergurgl	11°01'06,81" E, 46°51'43,6" N	E. Hörandl	2017-07-23	GOET	8	12	6	hegetschweileri	hegetschweileri	64	26.125	2.44814	76	0.425	4.658	0

## Sheet: infrared spectroscopy
Wagner et al., 2023
near infra-red spectroscopy
ID	Species	origin		coordinates	coll by	date	Herbarium
EH10180	bicolor	Germany	Harz, Brocken (loc. class.)	10°36' 54,08 E, 51° 47' 59,55" N	E. Hörandl	2014-06-20	GOET
EH10170	bicolor	Germany	Harz, Brocken (loc. class.)	10°37' 11,43 E, 51° 47' 59,99" N	E. Hörandl	2014-06-20	GOET
NW17.048	bicolor	Austria	Alps, Dr. Josef-Mehrlhütte	13°46' 431'' E, 46°58' 672'' N	N. Wagner	2017-08-04	GOET
NW17.040	bicolor	Austria	Alps, Dr. Josef-Mehrlhütte	13°46' 51'' E, 46°58' 70'' N	N. Wagner	2017-08-04	GOET
EH233	bicolor	Austria	Alps, Dr. Josef-Mehrlhütte	13°46' E, 46°58' N	E. Hörandl	1990-07-07	GOET
EH234	bicolor	Austria	Alps, Dr. Josef-Mehrlhütte	13°46' E, 46°58' N	E. Hörandl	1990-07-07	WU/ GOET
EH238	bicolor	Austria	Alps, Dr. Josef-Mehrlhütte	13°46' E, 46°58' N	E. Hörandl	1990-07-16	WU/ GOET
EH246	bicolor	Austria	Alps, Dr. Josef-Mehrlhütte	13°46' E, 46°58' N	E. Hörandl	1990-07-16	GOET
EH252	bicolor	Austria	Alps, Dr. Josef-Mehrlhütte	13°46' E, 46°58' N	E. Hörandl	1990-07-16	GOET
EH372	bicolor	Austria	Kremsbach, Innerkrems	13°46' E, 46°58' N	E. Hörandl	1990-09-11	WU/ GOET
EH374	bicolor	Austria	Alps, Dr. Josef-Mehrlhütte	13°46' E, 46°58' N	E. Hörandl	1990-09-09	GOET
EH375	bicolor	Austria	Alps, Dr. Josef-Mehrlhütte	13°46' E, 46°58' N	E. Hörandl	1990-09-09	GOET
EH376	bicolor	Austria	Alps, Dr. Josef-Mehrlhütte	13°46' E, 46°58' N	E. Hörandl	1990-09-11	WU
EH10191	phylicifolia	Norway	Dovrefjell	9°16'47,7'' E, 62°07'09,7'' N	E. Hörandl, S. Hörandl, F. Hadacek	2014-08-07	GOET
EH10197	phylicifolia	Norway	Dovrefjell	9°16'47,7'' E, 62°07'09,7'' N	E. Hörandl, S. Hörandl, F. Hadacek	2014-08-07	GOET
EH10207	phylicifolia	Norway	Reinheimen	61°54'10,9'' N; 9°08'31,8'' E	E. Hörandl, S. Hörandl, F. Hadacek	2014-08-08	GOET
EH10211	phylicifolia	Norway	Reinheimen	61°54'32,4'' N; 9°09'05,2'' E	E. Hörandl, S. Hörandl, F. Hadacek	2014-08-08	GOET
EH10217	phylicifolia	Norway	Myrdal	7°06'24,4'' E, 60°43'33,4'' N	E. Hörandl, S. Hörandl, F. Hadacek	2014-08-14	GOET
EH10884	hegetschweileri	Switzerland	Urserental, loc. class.	8°31'25.0" E, 46°36'22.0" N,	E. Hörandl	2020-07-28	GOET
EH10885	hegetschweileri	Switzerland	Urserental, loc. class.	8°31'25.0" E, 46°36'22.0" N,	E. Hörandl	2020-07-28	GOET
EH10849	myrsinifolia	Sweden	Southern Sweden	57,06833 N 16,91639 E	E. Hörandl, S. Hörandl & F. Hadacek	2017-05-29	GOET
RUS_20_10	jenisseensis c.f.	Russia	Komi Republic	n.a.	Maria Tomoshevich	n.a.	GOET
NW17.043	mielichhoferi	Austria	Alps, Dr. Josef-Mehrlhütte	46°58.703, 13°46.540	N. Wagner	2017-08-04	GOET													1
NW17.044	mielichhoferi	Austria	Alps, Dr. Josef-Mehrlhütte	46°58.703, 13°46.540	N. Wagner	2017-08-04	GOET													1	1
NW17.045	mielichhoferi	Austria	Alps, Dr. Josef-Mehrlhütte	46°58.709, 13°46.512	N. Wagner	2017-08-04	GOET													1
NW17.046	mielichoferi	Austria	Alps, Dr. Josef-Mehrlhütte	46°58.709, 13°46.512	N. Wagner	2017-08-04	GOET
EH10642	mielichhoferi	Italy	South Tyrol	46° 32' 46,8" N, 11°, 48', 21,9" E	E. Hörandl & F. Hadacek	2019-08-06	GOET													1
EH10682	mielichhoferi	Italy	South Tyrol	46° 32' 46,8" N, 11°, 48', 21,9" E	E. Hörandl & F. Hadacek	2019-08-06	GOET													1
EH10774	mielichhoferi	Austria	Salzburg	46° 58' 42,5" N, 13°, 46', 30,7" E	E. Hörandl & F. Hadacek	2019-08-06	GOET
EH10541	mielichhoferi	Italy	South Tyrol	46° 32' 46,8" N, 11°, 48', 21,9" E	E. Hörandl & F. Hadacek	2019-08-06	GOET
NW17.036	mielichoferi	Austria	Murtal, NP Hohe Tauern, Salzburg	47°07.279, 13°25.429	N. Wagner	2017-08-04	GOET
NW17.038	mielichoferi	Austria	Salzburg	47°07.178, 13°25.595	N. Wagner	2017-08-04	GOET
NW17.010	myrsinifolia	Estonia	Saaremaa, Orissaare	58°554634, 23°083282	N. Wagner	2017-06-29	GOET
NW17.013	myrsinifolia	Estonia	Saaremaa, Orissaare	58°554170, 23°082423	N. Wagner	2017-06-29	GOET
NW17.030	myrsinifolia	Austria	Hochkönig, Mühlbachtal	47°24.457, 13°07.612	N. Wagner	2017-08-03	GOET
NW17.054	myrsinifolia	Austria	Hochreit, Göstling an der Ybbs	47°48.672, 14°56.048	N. Wagner	2017-08-07	GOET
EH10944	myrsinifolia	Switzerland	Wallis	46°26'39.0" N, 7°53'44.3" E	E. Hörandl & F. Hadaèek	2020-07-31	GOET
EH10643	myrsinifolia	Italien	Dolomiten	46° 32' 46,8" N, 11°, 48', 21,9" E	E. Hörandl & F. Hadacek	2019-08-06	GOET
