# Supplementary material for: Insights into the Taxonomically Challenging Hexaploid Alpine Shrub Willows of Salix Sections Phylicifoliae and Nigricantes (Salicaceae)
Source: Plants (Basel). 2023 Mar 2;12(5):1144. doi: 10.3390/plants12051144 (PMC10005704; doi:10.3390/plants12051144)
Supplement: Supplementary file 1 [file plants-12-01144-s001.zip › Suppl_Table_S2_FlowCytometry.xlsx]

## Sheet: Sheet1
Wagner et al 2023
Supplement Tab. S2 - Flow cytometry results
		1st Measurement				2nd Measurement
Sample ID	Species	Part	Mean	CV	Median	Part	Mean	CV	Median	Ploidy
BICambur	S. bicolor	1514	45841.2	2.64	45853	1104	46044.4	2.03	46019	6x
BICchad1	S. bicolor	2815	46078.2	2.72	46036	2059	46047.6	3.75	45989	6x
BICchad2	S. bicolor	1449	45877.7	3.75	45710	3603	45034.9	2.5	45037	6x
EH11170	S. bicolor	1016	45581.9	0.84	45583					6x
EH11180	S. bicolor	1017	44571.7	0.78	44564					6x
NW20.001	S. kaptarae	503	30568.9	3.94	30467					4x
CAP1	S. caprea	1842	16532.1	4.95	16545	3230	16494.4	4.95	16480	2x	Reference
CAP2	S. caprea	4788	14932.8	7.12	14983	10951	14903.6	12.03	15035	2x	Reference
CAP3	S. caprea	9461	13274.3	13.05	13449	3769	15622	9.72	15649	2x	Reference
