# Supplementary material for: Insights into the Taxonomically Challenging Hexaploid Alpine Shrub Willows of Salix Sections Phylicifoliae and Nigricantes (Salicaceae)
Source: Plants (Basel). 2023 Mar 2;12(5):1144. doi: 10.3390/plants12051144 (PMC10005704; doi:10.3390/plants12051144)
Supplement: Supplementary file 1 [file plants-12-01144-s001.zip › Suppl_Table_S3_Morphometry statistics.xlsx]

## Sheet: Tabelle1
Wagner et al 2023
Suppl. Table S3
Statistics for morphometric analyses of section Phylicifoliae
Characters:
Leaf length
leaf width
angle
teeth
stipules
L_W
hairs density

## Sheet: leaf length
Shapiro-Wilk for normality
	All
N	40
Shapiro-Wilk W	0.9038
p(normal)	0.002466
Mann-Whitney pairwise, p values Bonferroni corrected
	bicolor	phylicifolia	hegetschweileri
bicolor		0.2592	0.0001821
phylicifolia	0.2592		0.008457
hegetschweileri	0.0001821	0.008457
Kruskal-Wallis test for equal medians
H (chi2):	16.78
Hc (tie corrected):	16.78
p (same):	0.000227
There is a significant difference between sample medians

## Sheet: leaf width
Shapiro-Wilk for normality
	All
N	40
Shapiro-Wilk W	0.9485
p(normal)	0.06758
Mann-Whitney tests
	bicolor	phylicifolia	hegetschweileri
bicolor		0.7368	9.846e-05
phylicifolia	0.7368		0.002236
hegetschweileri	9.846e-05	0.002236
Kruskal-Wallis test for equal medians
H (chi2):	18.87
Hc (tie corrected):	18.87
p (same):	7.969e-05
There is a significant difference between sample medians

## Sheet: angle
Shapiro-Wilk
	All
N	40
Shapiro-Wilk W	0.9656
p(normal)	0.2589
Mann-Whitney pairwise, p values Bonferroni corrected
	bicolor	phylicifolia	hegetschweileri
bicolor		0.1805	0.001068
phylicifolia	0.1805		0.0009721
hegetschweileri	0.001068	0.0009721
Kruskal-Wallis test for equal medians
H (chi2):	16.96
Hc (tie corrected):	16.96
p (same):	0.0002075
There is a significant difference between sample medians
Parametric: One-way ANOVA
Tukey's pairwise test:
	bicolor	phylicifolia	hegetschweileri
bicolor		0.5915	0.0004613
phylicifolia	1.392		0.0002715
hegetschweileri	5.96	6.214
Test for equal means
	Sum of sqrs	df	Mean square	F	p (same)
Between groups:	2583.42	2	1291.71	13.74	3.688e-05
Within groups:	3385.2	36	94.0332	Permutation p (n=99999)
Total:	5968.62	38	6e-05
Components of variance (only for random effects):
Var(group):	98.129	Var(error):	94.0332	ICC:	0.510657
omega2:	0.3951
Levene´s test for homogeneity of variance, from means	p (same):	0.5234
Levene´s test, from medians	p (same):	0.4724
Welch F test in the case of unequal variances: F=12,69, df=17,27, p=0,0004073

## Sheet: teeth
Shapiro-Wilk
	All
N	40
Shapiro-Wilk W	0.8808
p(normal)	0.0005547
Mann-Whitney pairwise, p values Bonferroni corrected
	bicolor	phylicifolia	hegetschweileri
bicolor		0.0003857	0.001092
phylicifolia	0.0003857		0.0006227
hegetschweileri	0.001092	0.0006227
Kruskal-Wallis test for equal medians
H (chi2):	31.82
Hc (tie corrected):	31.9
p (same):	0.0001184
There is a significant difference between sample medians

## Sheet: stipules
Shapiro-Wilk for normality
	All
N	40
Shapiro-Wilk W	0.8469
p(normal)	7.567e-05
Mann-Whitney pairwise, p values Bonferroni corrected
	bicolor	phylicifolia	hegetschweileri
bicolor		0.8311	0.001122
phylicifolia	0.8311		0.0001516
hegetschweileri	0.00	0.0001516
Kruskal-Wallis test for equal medians
H (chi2):	28.99
Hc (tie corrected):	29.09
p (same):	4.8258e-07
There is a significant difference between sample medians

## Sheet: L_W
Shapiro-Wilk for normality
	All
N	40
Shapiro-Wilk W	0.9423
p(normal)	0.04149
Mann-Whitney pairwise, p values Bonferroni corrected
	bicolor	phylicifolia	hegetschweileri
bicolor		0.3781	0.3028
phylicifolia	0.3781		0.2147
hegetschweileri	0.3028	0.2147
Kruskal-Wallis test for equal medians
H (chi2):	2.35
Hc (tie corrected):	2.35
p (same):	0.3089
There is no significant difference between sample medians

## Sheet: hairs density
Shapiro-Wilk for normality
	All
N	40
Shapiro-Wilk W	0.5717
p(normal)	1.313e-06
ANOVA failed due to lack of variance
