# Supplementary material for: Insights into the Taxonomically Challenging Hexaploid Alpine Shrub Willows of Salix Sections Phylicifoliae and Nigricantes (Salicaceae)
Source: Plants (Basel). 2023 Mar 2;12(5):1144. doi: 10.3390/plants12051144 (PMC10005704; doi:10.3390/plants12051144)
Supplement: Supplementary file 1 [file plants-12-01144-s001.zip › Suppl_Table_S4_hegetschweileri-myrsinifolia.xlsx]

## Sheet: Tabelle1
Wagner et al. 2023
Suppl. Table S4
Morphological differences between S. hegetschweileri and S. myrsinifolia (after [24,35])
	S. hegetschweileri	S. myrsinifolia
Leaves (lower side)	glaucous wax layer over the whole surface	glaucous wax layer missing at apex (green tip) or missing completely (surface green)
	glabrous	hairy, mostly on veins, sometimes glabrous
Leaves (upper side)	shiny	dull to shiny
Leaves (dried)	remaining green	becoming black
